# Supplementary material for: Fungal infection, decline and persistence in the only obligate troglodytic Neotropical salamander
Source: PeerJ journal article supplement (doi:10.7717/peerj.9763), 2020-09-22
Supplement: Cmagnipes_Bd_FIgureS1_Phylogeny.pdf [file Cmagnipes_Bd_FIgureS1_Phylogeny.pdf]

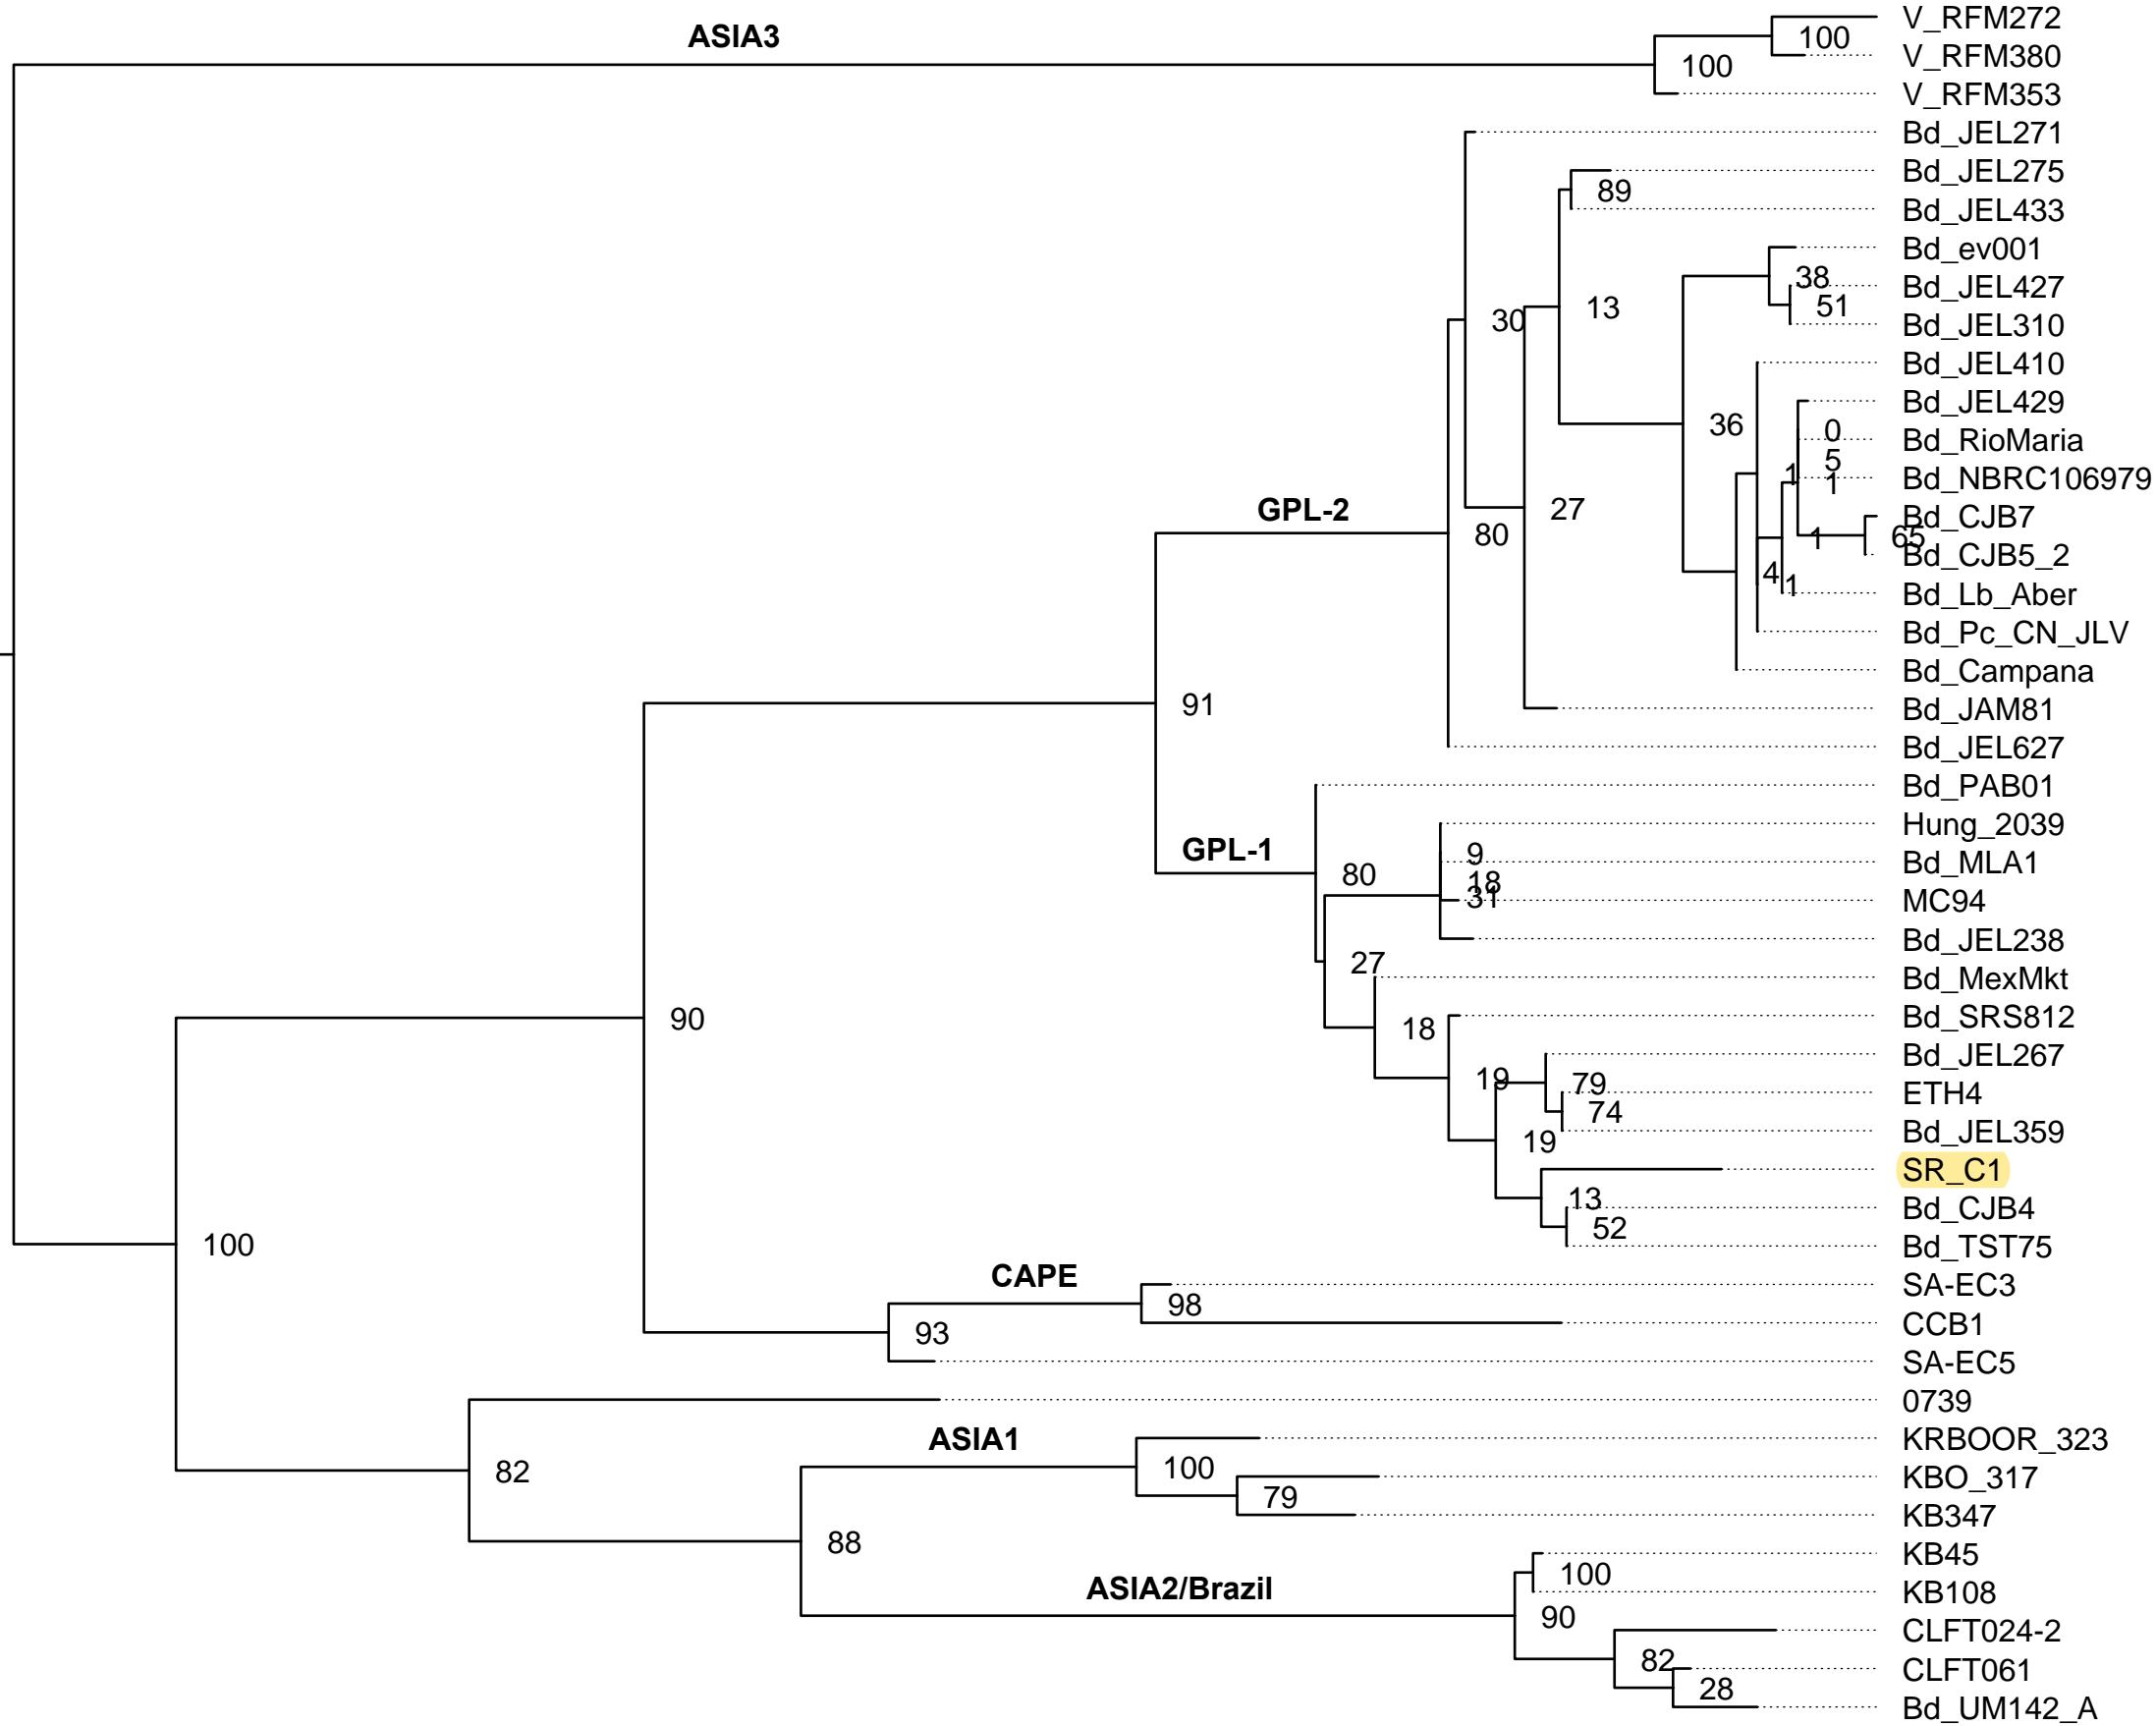

0.002
