# Supplementary material for: Fungal infection, decline and persistence in the only obligate troglodytic Neotropical salamander
Source: PeerJ. 2020 Sep 22;8:e9763. doi: 10.7717/peerj.9763 (PMC7518159; doi:10.7717/peerj.9763)
Supplement: Supplemental Information 2 — For Bd positive living specimens (diseaseTested = Bd, disease Detected = TRUE, basis Of Record = Living Specimen), number of Bd zoospores detected (quantity Detected) and genomic equivalents (ZE score) are provided; these values are equal to zero for all negative Bd tests and all Bsal. For Bd tests on preserved museum specimens (basis Of Record = Preserved Specimen), results are presented only as Bd positive or negative (disease Detected) because the qPCR assay does not provide reliable quantitative information on zoospores from formalin-preserved museum specimens. The results of these qPCR assays were used as the raw data to calculate Bd infection intensity (ZE score) and prevalence (detected vs. not detected) for extant populations of amphibians and prevalence (detected vs. not detected) for historical population samples. [file peerj-08-9763-s002.xlsx]

## Sheet: Instructions
~naan=21547~	~project_id=26~
Amphibian Disease
Templated generated on May 11, 2020
Person(s) responsible for data entry [ ]
Samples Tab
Please fill out each field in the "Samples" tab as completely as possible. Fields in red are required (data cannot be uploaded to the database without these fields). Required and recommended fields are usually placed towards the beginning of the template. Some fields have a controlled vocabulary associated with them in the "Lists" tab and are provided as data validation in the provided cellsIf yo…
Data Fields Tab
This tab contains column names, associated URIs and definitions for each column.
Lists Tab
This tab contains controlled vocabulary lists for certain fields. DO NOT EDIT this sheet!

## Sheet: Samples
ContactName	Collector	coordinateUncertaintyInMeters	decimalLongitude	decimalLatitude	dateCollected	specificEpithet	genus	fatal	diseaseDetected	sampleType	diseaseTested	sampleID	basisOfRecord	occurrenceID	institutionCode	collectionCode	catalogNumber	labNumber	diseaseLineage	genotypeMethod	sequenceURI	specimenDisposition	originalsource	infraspecificEpithet	lifeStage	sex	datum	georeferenceSource	elevation	depth	Collector2	Collector3	verbatimLocality	Habitat	Test_Method	eventRemarks	quantityDetected	dilutionFactor	cycleTimeFirstDetection	diagnosticLab	fieldNumber	ZEscore	month	day	year	country	state_province
Sean Rovito	Mizraim Olivares Miranda	10	-99.0481	21.3309	2017-03-23	decoratus	Craugastor	FALSE	FALSE	swabbing	Bd	BA1	LivingSpecimen										wild				WGS84	GPS (Garmin)	879		Sean Rovito	Julio César Garcia Sanchez	Cueva de la Barranca, 4.7 km W (by rd) then 0.6 km by trail W of Xilitlilla	cave	quantitative PCR											Mexico	San Luis Potosi
Sean Rovito	Mizraim Olivares Miranda	10	-99.0481	21.3309	2017-03-23	decoratus	Craugastor	FALSE	TRUE	swabbing	Bd	BA2	LivingSpecimen										wild				WGS84	GPS (Garmin)	879		Sean Rovito	Julio César Garcia Sanchez	Cueva de la Barranca, 4.7 km W (by rd) then 0.6 km by trail W of Xilitlilla	cave	quantitative PCR		20.44	80				1779.5				Mexico	San Luis Potosi
Sean Rovito	Mizraim Olivares Miranda	9	-99.2262	20.8881	2017-03-21	cystignathoides	Eleutherodactylus	FALSE	FALSE	swabbing	Bd	C02	LivingSpecimen										wild				WGS84	GPS (Garmin)	2234		Sean Rovito	Julio César Garcia Sanchez	El Coni, 900 m SSE of center of Durango, Parque Nacional los Marmoles	cave	quantitative PCR											Mexico	Hidalgo
Sean Rovito	Mizraim Olivares Miranda	9	-99.2262	20.8881	2017-03-21	cystignathoides	Eleutherodactylus	FALSE	FALSE	swabbing	Bd	C03	LivingSpecimen										wild				WGS84	GPS (Garmin)	2234		Sean Rovito	Julio César Garcia Sanchez	El Coni, 900 m SSE of center of Durango, Parque Nacional los Marmoles	cave	quantitative PCR											Mexico	Hidalgo
Sean Rovito	Mizraim Olivares Miranda	9	-99.2262	20.8881	2017-03-21	magnipes	Chiropterotriton	FALSE	FALSE	swabbing	Bd	CO	LivingSpecimen										wild				WGS84	GPS (Garmin)	2234		Sean Rovito	Julio César Garcia Sanchez	El Coni, 900 m SSE of center of Durango, Parque Nacional los Marmoles	cave	quantitative PCR											Mexico	Hidalgo
Sean Rovito	Mizraim Olivares Miranda	9	-99.2262	20.8881	2017-03-21	sp.	Aquiloeurycea	FALSE	FALSE	swabbing	Bd	CO1	LivingSpecimen										wild				WGS84	GPS (Garmin)	2234		Sean Rovito	Julio César Garcia Sanchez	El Coni, 900 m SSE of center of Durango, Parque Nacional los Marmoles	cave	quantitative PCR											Mexico	Hidalgo
Sean Rovito	Mizraim Olivares Miranda	9	-99.2262	20.8881	2017-07-31	magnipes	Chiropterotriton	FALSE	FALSE	swabbing	Bd	CO10	LivingSpecimen										wild				WGS84	GPS (Garmin)	2234		Sean Rovito	Julio César Garcia Sanchez	El Coni, 900 m SSE of center of Durango, Parque Nacional los Marmoles	cave	quantitative PCR											Mexico	Hidalgo
Sean Rovito	Mizraim Olivares Miranda	9	-99.2262	20.8881	2017-07-31	mosaueri	Chiropterotriton	FALSE	FALSE	swabbing	Bd	CO11	LivingSpecimen										wild				WGS84	GPS (Garmin)	2234		Sean Rovito	Julio César Garcia Sanchez	El Coni, 900 m SSE of center of Durango, Parque Nacional los Marmoles	cave	quantitative PCR											Mexico	Hidalgo
Sean Rovito	Mizraim Olivares Miranda	9	-99.2262	20.8881	2017-08-23	magnipes	Chiropterotriton	FALSE	FALSE	swabbing	Bd	CO12	LivingSpecimen										wild				WGS84	GPS (Garmin)	2234		Sean Rovito	Julio César Garcia Sanchez	El Coni, 900 m SSE of center of Durango, Parque Nacional los Marmoles	cave	quantitative PCR											Mexico	Hidalgo
Sean Rovito	Mizraim Olivares Miranda	9	-99.2262	20.8881	2017-08-23	sp.	Aquiloeurycea	FALSE	TRUE	swabbing	Bd	CO13	LivingSpecimen										wild				WGS84	GPS (Garmin)	2234		Sean Rovito	Julio César Garcia Sanchez	El Coni, 900 m SSE of center of Durango, Parque Nacional los Marmoles	cave	quantitative PCR		2.84	80				247.186				Mexico	Hidalgo
Sean Rovito	Mizraim Olivares Miranda	9	-99.2262	20.8881	2018-10-08	mosaueri	Chiropterotriton	FALSE	TRUE	swabbing	Bd	CO14	LivingSpecimen										wild				WGS84	GPS (Garmin)	2234		Sean Rovito	Julio César Garcia Sanchez	El Coni, 900 m SSE of center of Durango, Parque Nacional los Marmoles	cave	quantitative PCR		9.39	80				2517.64				Mexico	Hidalgo
Sean Rovito	Mizraim Olivares Miranda	9	-99.2262	20.8881	2018-10-08	sp.	Aquiloeurycea	FALSE	TRUE	swabbing	Bd	CO15	LivingSpecimen										wild				WGS84	GPS (Garmin)	2234		Sean Rovito	Julio César Garcia Sanchez	El Coni, 900 m SSE of center of Durango, Parque Nacional los Marmoles	cave	quantitative PCR		11.27	80				998.4				Mexico	Hidalgo
Sean Rovito	Mizraim Olivares Miranda	9	-99.2262	20.8881	2018-10-17	sp.	Aquiloeurycea	FALSE	FALSE	swabbing	Bd	CO17	LivingSpecimen										wild				WGS84	GPS (Garmin)	2234		Sean Rovito	Julio César Garcia Sanchez	El Coni, 900 m SSE of center of Durango, Parque Nacional los Marmoles	cave	quantitative PCR											Mexico	Hidalgo
Sean Rovito	Mizraim Olivares Miranda	9	-99.2262	20.8881	2017-06-12	magnipes	Chiropterotriton	FALSE	FALSE	swabbing	Bd	CO4	LivingSpecimen										wild				WGS84	GPS (Garmin)	2234		Sean Rovito	Julio César Garcia Sanchez	El Coni, 900 m SSE of center of Durango, Parque Nacional los Marmoles	cave	quantitative PCR											Mexico	Hidalgo
Sean Rovito	Mizraim Olivares Miranda	9	-99.2262	20.8881	2017-06-12	mosaueri	Chiropterotriton	FALSE	FALSE	swabbing	Bd	CO5	LivingSpecimen										wild				WGS84	GPS (Garmin)	2234		Sean Rovito	Julio César Garcia Sanchez	El Coni, 900 m SSE of center of Durango, Parque Nacional los Marmoles	cave	quantitative PCR											Mexico	Hidalgo
Sean Rovito	Mizraim Olivares Miranda	9	-99.2262	20.8881	2017-06-12	sp.	Aquiloeurycea	FALSE	FALSE	swabbing	Bd	CO6	LivingSpecimen										wild				WGS84	GPS (Garmin)	2234		Sean Rovito	Julio César Garcia Sanchez	El Coni, 900 m SSE of center of Durango, Parque Nacional los Marmoles	cave	quantitative PCR											Mexico	Hidalgo
Sean Rovito	Mizraim Olivares Miranda	9	-99.2262	20.8881	2017-06-12	sp.	Aquiloeurycea	FALSE	FALSE	swabbing	Bd	CO7	LivingSpecimen										wild				WGS84	GPS (Garmin)	2234		Sean Rovito	Julio César Garcia Sanchez	El Coni, 900 m SSE of center of Durango, Parque Nacional los Marmoles	cave	quantitative PCR							4.34				Mexico	Hidalgo
Sean Rovito	Mizraim Olivares Miranda	9	-99.2262	20.8881	2017-07-31	magnipes	Chiropterotriton	FALSE	TRUE	swabbing	Bd	CO8	LivingSpecimen										wild				WGS84	GPS (Garmin)	2234		Sean Rovito	Julio César Garcia Sanchez	El Coni, 900 m SSE of center of Durango, Parque Nacional los Marmoles	cave	quantitative PCR		0.049	80				243.2				Mexico	Hidalgo
Sean Rovito	Mizraim Olivares Miranda	9	-99.2262	20.8881	2017-07-31	magnipes	Chiropterotriton	FALSE	TRUE	swabbing	Bd	CO9	LivingSpecimen										wild				WGS84	GPS (Garmin)	2234		Sean Rovito	Julio César Garcia Sanchez	El Coni, 900 m SSE of center of Durango, Parque Nacional los Marmoles	cave	quantitative PCR		2.79	80								Mexico	Hidalgo
Sean Rovito	Mizraim Olivares Miranda	6	-99.0526	21.3189	2017-03-23	cystignathoides	Eleutherodactylus	FALSE	FALSE	swabbing	Bd	IG1	LivingSpecimen										wild				WGS84	GPS (Garmin)	1193		Sean Rovito	Julio César Garcia Sanchez	Cueva de la Iglesia, Ahuacatlan	cave	quantitative PCR											Mexico	San Luis Potosi
Sean Rovito	Mizraim Olivares Miranda	8	-94.172	16.5593	2017-07-12	niger	Ixalotriton	FALSE	FALSE	swabbing	Bd	IN1	LivingSpecimen										wild				WGS84	GPS (Garmin)	1592		Sean Rovito	Julio César Garcia Sanchez	Cerro Baul, 1.3 km NE (by air) of Rodulfo Figueroa on trail to top of Cerro Baul	cave	quantitative PCR											Mexico	Chiapas
Sean Rovito	Mizraim Olivares Miranda	8	-94.172	16.5593	2017-07-12	niger	Ixalotriton	FALSE	FALSE	swabbing	Bd	IN2	LivingSpecimen										wild				WGS84	GPS (Garmin)	1592		Sean Rovito	Julio César Garcia Sanchez	Cerro Baul, 1.3 km NE (by air) of Rodulfo Figueroa on trail to top of Cerro Baul	cave	quantitative PCR											Mexico	Chiapas
Sean Rovito	Mizraim Olivares Miranda	8	-91.7924	16.4631	2017-07-21	pernix	Nyctanolis	FALSE	FALSE	swabbing	Bd	NP	LivingSpecimen										wild				WGS84	GPS (Garmin)	2133		Sean Rovito	Julio César Garcia Sanchez	6.2 km ENE (by rd) of Leyva Velazquez	cave	quantitative PCR											Mexico	Chiapas
Sean Rovito	Mizraim Olivares Miranda	9	-99.072	21.4028	2017-07-06	magnipes	Chiropterotriton	FALSE	FALSE	swabbing	Bd	TR1	LivingSpecimen										wild				WGS84	GPS (Garmin)	1984		Sean Rovito	Julio César Garcia Sanchez	La Trinidad	cave	quantitative PCR											Mexico	San Luis Potosi
Sean Rovito	Mizraim Olivares Miranda	9	-99.072	21.4028	2017-07-07	magnipes	Chiropterotriton	FALSE	FALSE	swabbing	Bd	TR2	LivingSpecimen										wild				WGS84	GPS (Garmin)	1984		Sean Rovito	Julio César Garcia Sanchez	La Trinidad	cave	quantitative PCR											Mexico	San Luis Potosi
Sean Rovito	Mizraim Olivares Miranda	9	-99.072	21.4028	2017-07-07	magnipes	Chiropterotriton	FALSE	FALSE	swabbing	Bd	TR3	LivingSpecimen										wild				WGS84	GPS (Garmin)	1984		Sean Rovito	Julio César Garcia Sanchez	La Trinidad	cave	quantitative PCR											Mexico	San Luis Potosi
Sean Rovito	Mizraim Olivares Miranda	9	-99.072	21.4028	2017-07-07	magnipes	Chiropterotriton	FALSE	FALSE	swabbing	Bd	TR4	LivingSpecimen										wild				WGS84	GPS (Garmin)	1984		Sean Rovito	Julio César Garcia Sanchez	La Trinidad	cave	quantitative PCR											Mexico	San Luis Potosi
Sean Rovito	Mizraim Olivares Miranda	9	-99.072	21.4028	2017-07-07	magnipes	Chiropterotriton	FALSE	FALSE	swabbing	Bd	TR5	LivingSpecimen										wild				WGS84	GPS (Garmin)	1984		Sean Rovito	Julio César Garcia Sanchez	La Trinidad	cave	quantitative PCR											Mexico	San Luis Potosi
Sean Rovito	Mizraim Olivares Miranda	9	-99.072	21.4028	2017-08-01	magnipes	Chiropterotriton	FALSE	FALSE	swabbing	Bd	TR6	LivingSpecimen										wild				WGS84	GPS (Garmin)	1984		Sean Rovito	Julio César Garcia Sanchez	La Trinidad	cave	quantitative PCR											Mexico	San Luis Potosi
Sean Rovito	Mizraim Olivares Miranda	9	-99.072	21.4028	2017-08-24	magnipes	Chiropterotriton	FALSE	TRUE	swabbing	Bd	TR7	LivingSpecimen										wild				WGS84	GPS (Garmin)	1984		Sean Rovito	Julio César Garcia Sanchez	La Trinidad	cave	quantitative PCR		3.59	80				312.2				Mexico	San Luis Potosi
Sean Rovito	Mizraim Olivares Miranda	9	-99.072	21.4028	2018-10-18	magnipes	Chiropterotriton	FALSE	FALSE	swabbing	Bd	TR8	LivingSpecimen										wild				WGS84	GPS (Garmin)	1984		Sean Rovito	Julio César Garcia Sanchez	La Trinidad	cave	quantitative PCR											Mexico	San Luis Potosi
Sean Rovito	Mizraim Olivares Miranda	9	-99.072	21.4028	2018-10-18	magnipes	Chiropterotriton	FALSE	TRUE	swabbing	Bd	TR9	LivingSpecimen										wild				WGS84	GPS (Garmin)	1984		Sean Rovito	Julio César Garcia Sanchez	La Trinidad	cave	quantitative PCR		5.9	80				472.3				Mexico	San Luis Potosi
Sean Rovito	Mizraim Olivares Miranda	9	-99.2262	20.8881	2017-03-21	magnipes	Chiropterotriton	FALSE	FALSE	swabbing	Bsal	CO	LivingSpecimen										wild				WGS84	GPS (Garmin)	2234		Sean Rovito	Julio César Garcia Sanchez	El Coni, 900 m SSE of center of Durango, Parque Nacional los Marmoles	cave	quantitative PCR					Catenazzi Lab, Florida International University						Mexico	Hidalgo
Sean Rovito	Mizraim Olivares Miranda	9	-99.2262	20.8881	2017-03-21	sp.	Aquiloeurycea	FALSE	FALSE	swabbing	Bsal	CO1	LivingSpecimen										wild				WGS84	GPS (Garmin)	2234		Sean Rovito	Julio César Garcia Sanchez	El Coni, 900 m SSE of center of Durango, Parque Nacional los Marmoles	cave	quantitative PCR					Catenazzi Lab, Florida International University						Mexico	Hidalgo
Sean Rovito	Mizraim Olivares Miranda	9	-99.2262	20.8881	2017-07-31	mosaueri	Chiropterotriton	FALSE	FALSE	swabbing	Bsal	CO11	LivingSpecimen										wild				WGS84	GPS (Garmin)	2234		Sean Rovito	Julio César Garcia Sanchez	El Coni, 900 m SSE of center of Durango, Parque Nacional los Marmoles	cave	quantitative PCR					Catenazzi Lab, Florida International University						Mexico	Hidalgo
Sean Rovito	Mizraim Olivares Miranda	9	-99.2262	20.8881	2017-06-12	magnipes	Chiropterotriton	FALSE	FALSE	swabbing	Bsal	CO4	LivingSpecimen										wild				WGS84	GPS (Garmin)	2234		Sean Rovito	Julio César Garcia Sanchez	El Coni, 900 m SSE of center of Durango, Parque Nacional los Marmoles	cave	quantitative PCR					Catenazzi Lab, Florida International University						Mexico	Hidalgo
Sean Rovito	Mizraim Olivares Miranda	9	-99.2262	20.8881	2017-06-12	mosaueri	Chiropterotriton	FALSE	FALSE	swabbing	Bsal	CO5	LivingSpecimen										wild				WGS84	GPS (Garmin)	2234		Sean Rovito	Julio César Garcia Sanchez	El Coni, 900 m SSE of center of Durango, Parque Nacional los Marmoles	cave	quantitative PCR					Catenazzi Lab, Florida International University						Mexico	Hidalgo
Sean Rovito	Mizraim Olivares Miranda	9	-99.2262	20.8881	2017-06-12	sp.	Aquiloeurycea	FALSE	FALSE	swabbing	Bsal	CO6	LivingSpecimen										wild				WGS84	GPS (Garmin)	2234		Sean Rovito	Julio César Garcia Sanchez	El Coni, 900 m SSE of center of Durango, Parque Nacional los Marmoles	cave	quantitative PCR					Catenazzi Lab, Florida International University						Mexico	Hidalgo
Sean Rovito	Mizraim Olivares Miranda	9	-99.2262	20.8881	2017-06-12	sp.	Aquiloeurycea	FALSE	FALSE	swabbing	Bsal	CO7	LivingSpecimen										wild				WGS84	GPS (Garmin)	2234		Sean Rovito	Julio César Garcia Sanchez	El Coni, 900 m SSE of center of Durango, Parque Nacional los Marmoles	cave	quantitative PCR					Catenazzi Lab, Florida International University						Mexico	Hidalgo
Sean Rovito	Mizraim Olivares Miranda	9	-99.2262	20.8881	2017-07-31	magnipes	Chiropterotriton	FALSE	FALSE	swabbing	Bsal	CO8	LivingSpecimen										wild				WGS84	GPS (Garmin)	2234		Sean Rovito	Julio César Garcia Sanchez	El Coni, 900 m SSE of center of Durango, Parque Nacional los Marmoles	cave	quantitative PCR					Catenazzi Lab, Florida International University						Mexico	Hidalgo
Sean Rovito	Mizraim Olivares Miranda	9	-99.2262	20.8881	2017-07-31	magnipes	Chiropterotriton	FALSE	FALSE	swabbing	Bsal	CO9	LivingSpecimen										wild				WGS84	GPS (Garmin)	2234		Sean Rovito	Julio César Garcia Sanchez	El Coni, 900 m SSE of center of Durango, Parque Nacional los Marmoles	cave	quantitative PCR					Catenazzi Lab, Florida International University						Mexico	Hidalgo
Sean Rovito	Mizraim Olivares Miranda	8	-94.172	16.5593	2017-07-12	niger	Ixalotriton	FALSE	FALSE	swabbing	Bsal	IN1	LivingSpecimen										wild				WGS84	GPS (Garmin)	1592		Sean Rovito	Julio César Garcia Sanchez	Cerro Baul, 1.3 km NE (by air) of Rodulfo Figueroa on trail to top of Cerro Baul	cave	quantitative PCR					Catenazzi Lab, Florida International University						Mexico	Chiapas
Sean Rovito	Mizraim Olivares Miranda	8	-94.172	16.5593	2017-07-12	niger	Ixalotriton	FALSE	FALSE	swabbing	Bsal	IN2	LivingSpecimen										wild				WGS84	GPS (Garmin)	1592		Sean Rovito	Julio César Garcia Sanchez	Cerro Baul, 1.3 km NE (by air) of Rodulfo Figueroa on trail to top of Cerro Baul	cave	quantitative PCR					Catenazzi Lab, Florida International University						Mexico	Chiapas
Sean Rovito	Mizraim Olivares Miranda	8	-91.7924	16.4631	2017-07-21	pernix	Nyctanolis	FALSE	FALSE	swabbing	Bsal	NP	LivingSpecimen										wild				WGS84	GPS (Garmin)	2133		Sean Rovito	Julio César Garcia Sanchez	6.2 km ENE (by rd) of Leyva Velazquez	cave	quantitative PCR					Catenazzi Lab, Florida International University						Mexico	Chiapas
Sean Rovito	Mizraim Olivares Miranda	9	-99.072	21.4028	2017-07-06	magnipes	Chiropterotriton	FALSE	FALSE	swabbing	Bsal	TR1	LivingSpecimen										wild				WGS84	GPS (Garmin)	1984		Sean Rovito	Julio César Garcia Sanchez	La Trinidad	cave	quantitative PCR					Catenazzi Lab, Florida International University						Mexico	San Luis Potosi
Sean Rovito	Mizraim Olivares Miranda	9	-99.072	21.4028	2017-07-07	magnipes	Chiropterotriton	FALSE	FALSE	swabbing	Bsal	TR2	LivingSpecimen										wild				WGS84	GPS (Garmin)	1984		Sean Rovito	Julio César Garcia Sanchez	La Trinidad	cave	quantitative PCR					Catenazzi Lab, Florida International University						Mexico	San Luis Potosi
Sean Rovito	Mizraim Olivares Miranda	9	-99.072	21.4028	2017-07-07	magnipes	Chiropterotriton	FALSE	FALSE	swabbing	Bsal	TR3	LivingSpecimen										wild				WGS84	GPS (Garmin)	1984		Sean Rovito	Julio César Garcia Sanchez	La Trinidad	cave	quantitative PCR					Catenazzi Lab, Florida International University						Mexico	San Luis Potosi
Sean Rovito	Mizraim Olivares Miranda	9	-99.072	21.4028	2017-07-07	magnipes	Chiropterotriton	FALSE	FALSE	swabbing	Bsal	TR4	LivingSpecimen										wild				WGS84	GPS (Garmin)	1984		Sean Rovito	Julio César Garcia Sanchez	La Trinidad	cave	quantitative PCR					Catenazzi Lab, Florida International University						Mexico	San Luis Potosi
Sean Rovito	Mizraim Olivares Miranda	9	-99.072	21.4028	2017-07-07	magnipes	Chiropterotriton	FALSE	FALSE	swabbing	Bsal	TR5	LivingSpecimen										wild				WGS84	GPS (Garmin)	1984		Sean Rovito	Julio César Garcia Sanchez	La Trinidad	cave	quantitative PCR					Catenazzi Lab, Florida International University						Mexico	San Luis Potosi
Sean Rovito	Mizraim Olivares Miranda	5000	-99.1419	21.2861	1952-01-16	magnipes	Chiropterotriton	FALSE	FALSE	swabbing	Bd	CCS8	PreservedSpecimen		UMMZ		125129						wild										Cueva del Madrono near Laguna Colorada		quantitative PCR											Mexico	Queretaro
Sean Rovito	Mizraim Olivares Miranda	1930	-99.0581	21.0681	1952-01-20	magnipes	Chiropterotriton	FALSE	FALSE	swabbing	Bd	FMNH142457	PreservedSpecimen		FMNH		142457						wild										Cueva de Potrerillos, 2 km WSW Ahuacatlan		quantitative PCR											Mexico
Sean Rovito	Mizraim Olivares Miranda	1930	-99.0581	21.0681	1964-07-28	magnipes	Chiropterotriton	FALSE	FALSE	swabbing	Bd	GH9850	PreservedSpecimen		UMMZ		126368						wild										Cueva de Potrerillos, 2 km WSW Ahuacatlan		quantitative PCR											Mexico	San Luis Potosi
Sean Rovito	Mizraim Olivares Miranda	1930	-99.0581	21.0681	1964-07-28	magnipes	Chiropterotriton	FALSE	FALSE	swabbing	Bd	GH9852	PreservedSpecimen		UMMZ		125422						wild										Cueva de Potrerillos, 2 km WSW Ahuacatlan		quantitative PCR											Mexico	San Luis Potosi
Sean Rovito	Mizraim Olivares Miranda	1930	-99.0581	21.0681	1964-07-28	magnipes	Chiropterotriton	FALSE	FALSE	swabbing	Bd	GH9853	PreservedSpecimen		UMMZ		125422						wild										Cueva de Potrerillos, 2 km WSW Ahuacatlan		quantitative PCR											Mexico	San Luis Potosi
Sean Rovito	Mizraim Olivares Miranda	1930	-99.0581	21.0681	1964-07-28	magnipes	Chiropterotriton	FALSE	FALSE	swabbing	Bd	GH9854	PreservedSpecimen		UMMZ		125422						wild										Cueva de Potrerillos, 2 km WSW Ahuacatlan		quantitative PCR											Mexico	San Luis Potosi
Sean Rovito	Mizraim Olivares Miranda	1930	-99.0581	21.0681	1964-07-28	magnipes	Chiropterotriton	FALSE	FALSE	swabbing	Bd	GH9856	PreservedSpecimen		UMMZ		126368						wild										Cueva de Potrerillos, 2 km WSW Ahuacatlan		quantitative PCR											Mexico	San Luis Potosi
Sean Rovito	Mizraim Olivares Miranda	1930	-99.0581	21.0681	1964-07-28	magnipes	Chiropterotriton	FALSE	FALSE	swabbing	Bd	GH9857	PreservedSpecimen		UMMZ		126368						wild										Cueva de Potrerillos, 2 km WSW Ahuacatlan		quantitative PCR											Mexico	San Luis Potosi
Sean Rovito	Mizraim Olivares Miranda	1930	-99.0581	21.0681	1964-07-28	magnipes	Chiropterotriton	FALSE	FALSE	swabbing	Bd	GH9859	PreservedSpecimen		UMMZ		126368						wild										Cueva de Potrerillos, 2 km WSW Ahuacatlan		quantitative PCR											Mexico	San Luis Potosi
Sean Rovito	Mizraim Olivares Miranda	1930	-99.0581	21.0681	1964-07-28	magnipes	Chiropterotriton	FALSE	FALSE	swabbing	Bd	GH9860	PreservedSpecimen		UMMZ		126368						wild										Cueva de Potrerillos, 2 km WSW Ahuacatlan		quantitative PCR											Mexico	San Luis Potosi
Sean Rovito	Mizraim Olivares Miranda	1930	-99.0581	21.0681	1964-07-28	magnipes	Chiropterotriton	FALSE	FALSE	swabbing	Bd	GH9861	PreservedSpecimen		UMMZ		126368						wild										Cueva de Potrerillos, 2 km WSW Ahuacatlan		quantitative PCR											Mexico	San Luis Potosi
Sean Rovito	Mizraim Olivares Miranda	1930	-99.0581	21.0681	1964-07-28	magnipes	Chiropterotriton	FALSE	FALSE	swabbing	Bd	GH9862	PreservedSpecimen		UMMZ		126368						wild										Cueva de Potrerillos, 2 km WSW Ahuacatlan		quantitative PCR											Mexico	San Luis Potosi
Sean Rovito	Mizraim Olivares Miranda	1930	-99.0581	21.0681	1964-07-28	magnipes	Chiropterotriton	FALSE	FALSE	swabbing	Bd	GH9863	PreservedSpecimen		UMMZ		126368						wild										Cueva de Potrerillos, 2 km WSW Ahuacatlan		quantitative PCR											Mexico	San Luis Potosi
Sean Rovito	Mizraim Olivares Miranda	1930	-99.0581	21.0681	1964-07-28	magnipes	Chiropterotriton	FALSE	FALSE	swabbing	Bd	GH9864	PreservedSpecimen		UMMZ		126368						wild										Cueva de Potrerillos, 2 km WSW Ahuacatlan		quantitative PCR											Mexico	San Luis Potosi
Sean Rovito	Mizraim Olivares Miranda	1930	-99.0581	21.0681	1964-07-28	magnipes	Chiropterotriton	FALSE	FALSE	swabbing	Bd	GH9865	PreservedSpecimen		UMMZ		126368						wild										Cueva de Potrerillos, 2 km WSW Ahuacatlan		quantitative PCR											Mexico	San Luis Potosi
Sean Rovito	Mizraim Olivares Miranda	1930	-99.0581	21.0681	1964-07-28	magnipes	Chiropterotriton	FALSE	FALSE	swabbing	Bd	GH9866	PreservedSpecimen		UMMZ		126368						wild										Cueva de Potrerillos, 2 km WSW Ahuacatlan		quantitative PCR											Mexico	San Luis Potosi
Sean Rovito	Mizraim Olivares Miranda	1930	-99.0581	21.0681	1964-07-28	magnipes	Chiropterotriton	FALSE	FALSE	swabbing	Bd	GH9867	PreservedSpecimen		UMMZ		126368						wild										Cueva de Potrerillos, 2 km WSW Ahuacatlan		quantitative PCR											Mexico	San Luis Potosi
Sean Rovito	Mizraim Olivares Miranda	1930	-99.0581	21.0681	1964-07-28	magnipes	Chiropterotriton	FALSE	FALSE	swabbing	Bd	GH9868	PreservedSpecimen		UMMZ		126368						wild										Cueva de Potrerillos, 2 km WSW Ahuacatlan		quantitative PCR											Mexico	San Luis Potosi
Sean Rovito	Mizraim Olivares Miranda	1930	-99.0581	21.0681	1964-07-28	magnipes	Chiropterotriton	FALSE	FALSE	swabbing	Bd	GH9869	PreservedSpecimen		UMMZ		126368						wild										Cueva de Potrerillos, 2 km WSW Ahuacatlan		quantitative PCR											Mexico	San Luis Potosi
Sean Rovito	Mizraim Olivares Miranda	1930	-99.0581	21.0681	1964-07-28	magnipes	Chiropterotriton	FALSE	FALSE	swabbing	Bd	GH9870	PreservedSpecimen		UMMZ		126368						wild										Cueva de Potrerillos, 2 km WSW Ahuacatlan		quantitative PCR											Mexico	San Luis Potosi
Sean Rovito	Mizraim Olivares Miranda	1930	-99.0581	21.0681	1964-07-28	magnipes	Chiropterotriton	FALSE	FALSE	swabbing	Bd	GH9871	PreservedSpecimen		UMMZ		126368						wild										Cueva de Potrerillos, 2 km WSW Ahuacatlan		quantitative PCR											Mexico	San Luis Potosi
Sean Rovito	Mizraim Olivares Miranda	1930	-99.0581	21.0681	1964-07-28	magnipes	Chiropterotriton	FALSE	FALSE	swabbing	Bd	GH9872	PreservedSpecimen		UMMZ		126368						wild										Cueva de Potrerillos, 2 km WSW Ahuacatlan		quantitative PCR											Mexico	San Luis Potosi
Sean Rovito	Mizraim Olivares Miranda	1930	-99.0581	21.0681	1964-07-28	magnipes	Chiropterotriton	FALSE	FALSE	swabbing	Bd	GH9873	PreservedSpecimen		UMMZ		126368						wild										Cueva de Potrerillos, 2 km WSW Ahuacatlan		quantitative PCR											Mexico	San Luis Potosi
Sean Rovito	Mizraim Olivares Miranda	1930	-99.0581	21.0681	1964-07-28	magnipes	Chiropterotriton	FALSE	FALSE	swabbing	Bd	GH9874	PreservedSpecimen		UMMZ		126368						wild										Cueva de Potrerillos, 2 km WSW Ahuacatlan		quantitative PCR											Mexico	San Luis Potosi
Sean Rovito	Mizraim Olivares Miranda	1930	-99.0581	21.0681	1964-07-28	magnipes	Chiropterotriton	FALSE	FALSE	swabbing	Bd	GH9875	PreservedSpecimen		UMMZ		126368						wild										Cueva de Potrerillos, 2 km WSW Ahuacatlan		quantitative PCR											Mexico	San Luis Potosi
Sean Rovito	Mizraim Olivares Miranda	1930	-99.0581	21.0681	1964-07-28	magnipes	Chiropterotriton	FALSE	FALSE	swabbing	Bd	GH9876	PreservedSpecimen		UMMZ		126368						wild										Cueva de Potrerillos, 2 km WSW Ahuacatlan		quantitative PCR											Mexico	San Luis Potosi
Sean Rovito	Mizraim Olivares Miranda	1930	-99.0581	21.0681	1964-07-28	magnipes	Chiropterotriton	FALSE	FALSE	swabbing	Bd	GH9877	PreservedSpecimen		UMMZ		126368						wild										Cueva de Potrerillos, 2 km WSW Ahuacatlan		quantitative PCR											Mexico	San Luis Potosi
Sean Rovito	Mizraim Olivares Miranda	1930	-99.0581	21.0681	1964-07-28	magnipes	Chiropterotriton	FALSE	FALSE	swabbing	Bd	GH9878	PreservedSpecimen		UMMZ		126368						wild										Cueva de Potrerillos, 2 km WSW Ahuacatlan		quantitative PCR											Mexico	San Luis Potosi
Sean Rovito	Mizraim Olivares Miranda	1930	-99.0581	21.0681	1964-07-28	magnipes	Chiropterotriton	FALSE	FALSE	swabbing	Bd	GH9879	PreservedSpecimen		UMMZ		126368						wild										Cueva de Potrerillos, 2 km WSW Ahuacatlan		quantitative PCR											Mexico	San Luis Potosi
Sean Rovito	Mizraim Olivares Miranda	1930	-99.0581	21.0681	1964-07-28	magnipes	Chiropterotriton	FALSE	FALSE	swabbing	Bd	GH9880	PreservedSpecimen		UMMZ		126368						wild										Cueva de Potrerillos, 2 km WSW Ahuacatlan		quantitative PCR											Mexico	San Luis Potosi
Sean Rovito	Mizraim Olivares Miranda	1930	-99.0581	21.0681	1964-07-28	magnipes	Chiropterotriton	FALSE	FALSE	swabbing	Bd	GH9880	PreservedSpecimen		UMMZ		126368						wild										Cueva de Potrerillos, 2 km WSW Ahuacatlan		quantitative PCR											Mexico	San Luis Potosi
Sean Rovito	Mizraim Olivares Miranda	1930	-99.0581	21.0681	1964-07-28	magnipes	Chiropterotriton	FALSE	FALSE	swabbing	Bd	GH9881	PreservedSpecimen		UMMZ		126368						wild										Cueva de Potrerillos, 2 km WSW Ahuacatlan		quantitative PCR											Mexico	San Luis Potosi
Sean Rovito	Mizraim Olivares Miranda	1930	-99.0581	21.0681	1964-07-28	magnipes	Chiropterotriton	FALSE	FALSE	swabbing	Bd	GH9882	PreservedSpecimen		UMMZ		126368						wild										Cueva de Potrerillos, 2 km WSW Ahuacatlan		quantitative PCR											Mexico	San Luis Potosi
Sean Rovito	Mizraim Olivares Miranda	1930	-99.0581	21.0681	1964-07-28	magnipes	Chiropterotriton	FALSE	FALSE	swabbing	Bd	GH9885	PreservedSpecimen		UMMZ		126368						wild										Cueva de Potrerillos, 2 km WSW Ahuacatlan		quantitative PCR											Mexico	San Luis Potosi
Sean Rovito	Mizraim Olivares Miranda	1930	-99.0581	21.0681	1964-07-28	magnipes	Chiropterotriton	FALSE	FALSE	swabbing	Bd	GH9886	PreservedSpecimen		UMMZ		126368						wild										Cueva de Potrerillos, 2 km WSW Ahuacatlan		quantitative PCR											Mexico	San Luis Potosi
Sean Rovito	Mizraim Olivares Miranda	1930	-99.0581	21.0681	1964-07-28	magnipes	Chiropterotriton	FALSE	FALSE	swabbing	Bd	GH9886	PreservedSpecimen		UMMZ		126368						wild										Cueva de Potrerillos, 2 km WSW Ahuacatlan		quantitative PCR											Mexico	San Luis Potosi
Sean Rovito	Mizraim Olivares Miranda	1930	-99.0581	21.0681	1964-07-28	magnipes	Chiropterotriton	FALSE	FALSE	swabbing	Bd	GH9887	PreservedSpecimen		UMMZ		126368						wild										Cueva de Potrerillos, 2 km WSW Ahuacatlan		quantitative PCR											Mexico	San Luis Potosi
Sean Rovito	Mizraim Olivares Miranda	1930	-99.0581	21.0681	1964-07-28	magnipes	Chiropterotriton	FALSE	FALSE	swabbing	Bd	GH9888	PreservedSpecimen		UMMZ		126368						wild										Cueva de Potrerillos, 2 km WSW Ahuacatlan		quantitative PCR											Mexico	San Luis Potosi
Sean Rovito	Mizraim Olivares Miranda	1930	-99.0581	21.0681	1964-07-28	magnipes	Chiropterotriton	FALSE	FALSE	swabbing	Bd	GH9889	PreservedSpecimen		UMMZ		126368						wild										Cueva de Potrerillos, 2 km WSW Ahuacatlan		quantitative PCR											Mexico	San Luis Potosi
Sean Rovito	Mizraim Olivares Miranda	1930	-99.0581	21.0681	1964-07-28	magnipes	Chiropterotriton	FALSE	FALSE	swabbing	Bd	GH9890	PreservedSpecimen		UMMZ		126368						wild										Cueva de Potrerillos, 2 km WSW Ahuacatlan		quantitative PCR											Mexico	San Luis Potosi
Sean Rovito	Mizraim Olivares Miranda	1930	-99.0581	21.0681	1964-07-28	magnipes	Chiropterotriton	FALSE	FALSE	swabbing	Bd	GH9891	PreservedSpecimen		UMMZ		126368						wild										Cueva de Potrerillos, 2 km WSW Ahuacatlan		quantitative PCR											Mexico	San Luis Potosi
Sean Rovito	Mizraim Olivares Miranda	1930	-99.0581	21.0681	1964-07-28	magnipes	Chiropterotriton	FALSE	FALSE	swabbing	Bd	GH9892	PreservedSpecimen		UMMZ		126368						wild										Cueva de Potrerillos, 2 km WSW Ahuacatlan		quantitative PCR											Mexico	San Luis Potosi
Sean Rovito	Mizraim Olivares Miranda	1930	-99.0581	21.0681	1964-07-28	magnipes	Chiropterotriton	FALSE	FALSE	swabbing	Bd	GH9893	PreservedSpecimen		UMMZ		126368						wild										Cueva de Potrerillos, 2 km WSW Ahuacatlan		quantitative PCR											Mexico	San Luis Potosi
Sean Rovito	Mizraim Olivares Miranda	1930	-99.0581	21.0681	1964-07-28	magnipes	Chiropterotriton	FALSE	FALSE	swabbing	Bd	GH9894	PreservedSpecimen		UMMZ		126368						wild										Cueva de Potrerillos, 2 km WSW Ahuacatlan		quantitative PCR											Mexico	San Luis Potosi
Sean Rovito	Mizraim Olivares Miranda	1930	-99.0581	21.0681	1964-07-28	magnipes	Chiropterotriton	FALSE	FALSE	swabbing	Bd	GH9895	PreservedSpecimen		UMMZ		126368						wild										Cueva de Potrerillos, 2 km WSW Ahuacatlan		quantitative PCR											Mexico	San Luis Potosi
Sean Rovito	Mizraim Olivares Miranda	1930	-99.0581	21.0681	1964-07-28	magnipes	Chiropterotriton	FALSE	FALSE	swabbing	Bd	GH9896	PreservedSpecimen		UMMZ		126368						wild										Cueva de Potrerillos, 2 km WSW Ahuacatlan		quantitative PCR											Mexico	San Luis Potosi
Sean Rovito	Mizraim Olivares Miranda	1930	-99.0581	21.0681	1964-07-28	magnipes	Chiropterotriton	FALSE	FALSE	swabbing	Bd	GH9897	PreservedSpecimen		UMMZ		126368						wild										Cueva de Potrerillos, 2 km WSW Ahuacatlan		quantitative PCR											Mexico	San Luis Potosi
Sean Rovito	Mizraim Olivares Miranda	1930	-99.0581	21.0681	1964-07-28	magnipes	Chiropterotriton	FALSE	FALSE	swabbing	Bd	GH9898	PreservedSpecimen		UMMZ		126368						wild										Cueva de Potrerillos, 2 km WSW Ahuacatlan		quantitative PCR											Mexico	San Luis Potosi
Sean Rovito	Mizraim Olivares Miranda	3000	-99.0138	21.4212	1965-02-07	magnipes	Chiropterotriton	FALSE	FALSE	swabbing	Bd	LSUMZ13185	PreservedSpecimen		LSUMZ		13185						wild										Sotano sin nombre, near Tlamaya		quantitative PCR											Mexico	San Luis Potosi
Sean Rovito	Mizraim Olivares Miranda	3000	-99.0138	21.4212	1965-02-07	magnipes	Chiropterotriton	FALSE	FALSE	swabbing	Bd	LSUMZ13186	PreservedSpecimen		LSUMZ		13186						wild										Sotano sin nombre, near Tlamaya		quantitative PCR											Mexico	San Luis Potosi
Sean Rovito	Mizraim Olivares Miranda	3000	-99.0138	21.4212	1965-02-07	magnipes	Chiropterotriton	FALSE	FALSE	swabbing	Bd	LSUMZ13187	PreservedSpecimen		LSUMZ		13187						wild										Sotano sin nombre, near Tlamaya		quantitative PCR											Mexico	San Luis Potosi
Sean Rovito	Mizraim Olivares Miranda	3000	-99.0138	21.4212	1965-02-07	magnipes	Chiropterotriton	FALSE	FALSE	swabbing	Bd	LSUMZ13188	PreservedSpecimen		LSUMZ		13188						wild										Sotano de Tlamaya		quantitative PCR											Mexico	San Luis Potosi
Sean Rovito	Mizraim Olivares Miranda	1930	-99.0581	21.0681	1955-11-18	magnipes	Chiropterotriton	FALSE	FALSE	swabbing	Bd	MCZ30607	PreservedSpecimen		MCZ		30607						wild										Cueva de Potrerillos, Ahuacatlan		quantitative PCR											Mexico	San Luis Potosi
Sean Rovito	Mizraim Olivares Miranda	1930	-99.0581	21.0681	1952-01-20	magnipes	Chiropterotriton	FALSE	FALSE	swabbing	Bd	MCZ44033	PreservedSpecimen		MCZ		44033						wild										Cueva de Potrerillos, Ahuacatlan		quantitative PCR											Mexico	San Luis Potosi
Sean Rovito	Mizraim Olivares Miranda	2000	21.2688	-99.2019	1971-12-06	magnipes	Chiropterotriton	FALSE	FALSE	swabbing	Bd	MCZ85403	PreservedSpecimen		MCZ		85403						wild										ca. 15 mi E Landa de Matamoros		quantitative PCR											Mexico	Queretaro
Sean Rovito	Mizraim Olivares Miranda	1100	-99.1595	21.2719	1969-08-19	magnipes	Chiropterotriton	FALSE	FALSE	swabbing	Bd	MVZ128241	PreservedSpecimen		MVZ		128241						wild										3.2 mi W El Lobo		quantitative PCR											Mexico	Queretaro
Sean Rovito	Mizraim Olivares Miranda	1000	-99.1595	21.2719	1969-08-19	magnipes	Chiropterotriton	FALSE	FALSE	swabbing	Bd	MVZ128242	PreservedSpecimen		MVZ		128242						wild										3.2 mi W El Lobo		quantitative PCR											Mexico	Queretaro
Sean Rovito	Mizraim Olivares Miranda	1000	-99.1595	21.2719	1969-08-19	magnipes	Chiropterotriton	FALSE	FALSE	swabbing	Bd	MVZ128243	PreservedSpecimen		MVZ		128243						wild										3.2 mi W El Lobo		quantitative PCR											Mexico	Queretaro
Sean Rovito	Mizraim Olivares Miranda	1000	-99.1595	21.2719	1969-08-19	magnipes	Chiropterotriton	FALSE	FALSE	swabbing	Bd	MVZ128244	PreservedSpecimen		MVZ		128244						wild										3.2 mi W El Lobo		quantitative PCR											Mexico	Queretaro
Sean Rovito	Mizraim Olivares Miranda	1000	-99.1595	21.2719	1969-08-19	magnipes	Chiropterotriton	FALSE	FALSE	swabbing	Bd	MVZ128245	PreservedSpecimen		MVZ		128245						wild										3.2 mi W El Lobo		quantitative PCR											Mexico	Queretaro
Sean Rovito	Mizraim Olivares Miranda	1000	-99.1595	21.2719	1969-08-19	magnipes	Chiropterotriton	FALSE	FALSE	swabbing	Bd	MVZ128246	PreservedSpecimen		MVZ		128246						wild										3.2 mi W El Lobo		quantitative PCR											Mexico	Queretaro
Sean Rovito	Mizraim Olivares Miranda	1000	-99.1595	21.2719	1969-08-19	magnipes	Chiropterotriton	FALSE	FALSE	swabbing	Bd	MVZ128247	PreservedSpecimen		MVZ		128247						wild										3.2 mi W El Lobo		quantitative PCR											Mexico	Queretaro
Sean Rovito	Mizraim Olivares Miranda	1000	-99.1595	21.2719	1969-08-19	magnipes	Chiropterotriton	FALSE	FALSE	swabbing	Bd	MVZ128248	PreservedSpecimen		MVZ		128248						wild										3.2 mi W El Lobo		quantitative PCR											Mexico	Queretaro
Sean Rovito	Mizraim Olivares Miranda	1000	-99.1595	21.2719	1969-08-19	magnipes	Chiropterotriton	FALSE	FALSE	swabbing	Bd	MVZ128250	PreservedSpecimen		MVZ		128250						wild										3.2 mi W El Lobo		quantitative PCR											Mexico	Queretaro
Sean Rovito	Mizraim Olivares Miranda	1000	-99.1595	21.2719	1969-08-19	magnipes	Chiropterotriton	FALSE	FALSE	swabbing	Bd	MVZ128251	PreservedSpecimen		MVZ		128251						wild										3.2 mi W El Lobo		quantitative PCR											Mexico	Queretaro
Sean Rovito	Mizraim Olivares Miranda	1000	-99.1595	21.2719	1969-08-19	magnipes	Chiropterotriton	FALSE	FALSE	swabbing	Bd	MVZ128252	PreservedSpecimen		MVZ		128252						wild										3.2 mi W El Lobo		quantitative PCR											Mexico	Queretaro
Sean Rovito	Mizraim Olivares Miranda	1000	-99.1595	21.2719	1969-08-19	magnipes	Chiropterotriton	FALSE	FALSE	swabbing	Bd	MVZ128253	PreservedSpecimen		MVZ		128253						wild										3.2 mi W El Lobo		quantitative PCR											Mexico	Queretaro
Sean Rovito	Mizraim Olivares Miranda	1000	-99.1595	21.2719	1969-08-19	magnipes	Chiropterotriton	FALSE	FALSE	swabbing	Bd	MVZ128254	PreservedSpecimen		MVZ		128254						wild										3.2 mi W El Lobo		quantitative PCR											Mexico	Queretaro
Sean Rovito	Mizraim Olivares Miranda	1000	-99.1595	21.2719	1969-08-19	magnipes	Chiropterotriton	FALSE	FALSE	swabbing	Bd	MVZ128255	PreservedSpecimen		MVZ		128255						wild										3.2 mi W El Lobo		quantitative PCR											Mexico	Queretaro
Sean Rovito	Mizraim Olivares Miranda	1000	-99.1595	21.2719	1969-08-19	magnipes	Chiropterotriton	FALSE	FALSE	swabbing	Bd	MVZ128256	PreservedSpecimen		MVZ		128256						wild										3.2 mi W El Lobo		quantitative PCR											Mexico	Queretaro
Sean Rovito	Mizraim Olivares Miranda	1000	-99.1595	21.2719	1969-08-19	magnipes	Chiropterotriton	FALSE	FALSE	swabbing	Bd	MVZ128257	PreservedSpecimen		MVZ		128257						wild										3.2 mi W El Lobo		quantitative PCR											Mexico	Queretaro
Sean Rovito	Mizraim Olivares Miranda	1000	-99.1595	21.2719	1969-08-19	magnipes	Chiropterotriton	FALSE	FALSE	swabbing	Bd	MVZ128259	PreservedSpecimen		MVZ		128259						wild										3.2 mi W El Lobo		quantitative PCR											Mexico	Queretaro
Sean Rovito	Mizraim Olivares Miranda	1000	-99.1595	21.2719	1969-08-19	magnipes	Chiropterotriton	FALSE	FALSE	swabbing	Bd	MVZ128260	PreservedSpecimen		MVZ		128260						wild										3.2 mi W El Lobo		quantitative PCR											Mexico	Queretaro
Sean Rovito	Mizraim Olivares Miranda	883	-99.0503	21.3206	1975-05-04	magnipes	Chiropterotriton	FALSE	FALSE	swabbing	Bd	MVZ129008	PreservedSpecimen		MVZ		129008						wild										Cueva de La Iglesia, Ahuacatlan		quantitative PCR											Mexico	San Luis Potosi
Sean Rovito	Mizraim Olivares Miranda	883	-99.0503	21.3206	1975-05-04	magnipes	Chiropterotriton	FALSE	FALSE	swabbing	Bd	MVZ129009	PreservedSpecimen		MVZ		129009						wild										Cueva de La Iglesia, Ahuacatlan		quantitative PCR											Mexico	San Luis Potosi
Sean Rovito	Mizraim Olivares Miranda	883	-99.0503	21.3206	1975-05-04	magnipes	Chiropterotriton	FALSE	FALSE	swabbing	Bd	MVZ129012	PreservedSpecimen		MVZ		129012						wild										Cueva de La Iglesia, Ahuacatlan		quantitative PCR											Mexico	San Luis Potosi
Sean Rovito	Mizraim Olivares Miranda	883	-99.0503	21.3206	1975-05-04	magnipes	Chiropterotriton	FALSE	TRUE	swabbing	Bd	MVZ129014	PreservedSpecimen		MVZ		129014						wild										Cueva de La Iglesia, Ahuacatlan		quantitative PCR											Mexico	San Luis Potosi
Sean Rovito	Mizraim Olivares Miranda	883	-99.0503	21.3206	1975-05-04	magnipes	Chiropterotriton	FALSE	FALSE	swabbing	Bd	MVZ129016	PreservedSpecimen		MVZ		129016						wild										Cueva de La Iglesia, Ahuacatlan		quantitative PCR											Mexico	San Luis Potosi
Sean Rovito	Mizraim Olivares Miranda	883	-99.0503	21.3206	1975-05-04	magnipes	Chiropterotriton	FALSE	FALSE	swabbing	Bd	MVZ129017	PreservedSpecimen		MVZ		129017						wild										Cueva de La Iglesia, Ahuacatlan		quantitative PCR											Mexico	San Luis Potosi
Sean Rovito	Mizraim Olivares Miranda	883	-99.0503	21.3206	1975-05-04	magnipes	Chiropterotriton	FALSE	FALSE	swabbing	Bd	MVZ129018	PreservedSpecimen		MVZ		129018						wild										Cueva de La Iglesia, Ahuacatlan		quantitative PCR											Mexico	San Luis Potosi
Sean Rovito	Mizraim Olivares Miranda	883	-99.0503	21.3206	1975-05-04	magnipes	Chiropterotriton	FALSE	FALSE	swabbing	Bd	MVZ129019	PreservedSpecimen		MVZ		129019						wild										Cueva de La Iglesia, Ahuacatlan		quantitative PCR											Mexico	San Luis Potosi
Sean Rovito	Mizraim Olivares Miranda	883	-99.0503	21.3206	1975-05-04	magnipes	Chiropterotriton	FALSE	TRUE	swabbing	Bd	MVZ129020	PreservedSpecimen		MVZ		129020						wild										Cueva de La Iglesia, Ahuacatlan		quantitative PCR											Mexico	San Luis Potosi
Sean Rovito	Mizraim Olivares Miranda	883	-99.0503	21.3206	1975-05-04	magnipes	Chiropterotriton	FALSE	FALSE	swabbing	Bd	MVZ129022	PreservedSpecimen		MVZ		129022						wild										Cueva de La Iglesia, Ahuacatlan		quantitative PCR											Mexico	San Luis Potosi
Sean Rovito	Mizraim Olivares Miranda	883	-99.0503	21.3206	1975-05-04	magnipes	Chiropterotriton	FALSE	FALSE	swabbing	Bd	MVZ129023	PreservedSpecimen		MVZ		129023						wild										Cueva de La Iglesia, Ahuacatlan		quantitative PCR											Mexico	San Luis Potosi
Sean Rovito	Mizraim Olivares Miranda	883	-99.0503	21.3206	1975-05-04	magnipes	Chiropterotriton	FALSE	FALSE	swabbing	Bd	MVZ129024	PreservedSpecimen		MVZ		129024						wild										Cueva de La Iglesia, Ahuacatlan		quantitative PCR											Mexico	San Luis Potosi
Sean Rovito	Mizraim Olivares Miranda	883	-99.0503	21.3206	1975-05-04	magnipes	Chiropterotriton	FALSE	FALSE	swabbing	Bd	MVZ129025	PreservedSpecimen		MVZ		129025						wild										Cueva de La Iglesia, Ahuacatlan		quantitative PCR											Mexico	San Luis Potosi
Sean Rovito	Mizraim Olivares Miranda	883	-99.0503	21.3206	1975-05-04	magnipes	Chiropterotriton	FALSE	FALSE	swabbing	Bd	MVZ129026	PreservedSpecimen		MVZ		129026						wild										Cueva de La Iglesia, Ahuacatlan		quantitative PCR											Mexico	San Luis Potosi
Sean Rovito	Mizraim Olivares Miranda	883	-99.0503	21.3206	1975-05-04	magnipes	Chiropterotriton	FALSE	FALSE	swabbing	Bd	MVZ129027	PreservedSpecimen		MVZ		129027						wild										Cueva de La Iglesia, Ahuacatlan		quantitative PCR											Mexico	San Luis Potosi
Sean Rovito	Mizraim Olivares Miranda	883	-99.0503	21.3206	1975-05-04	magnipes	Chiropterotriton	FALSE	FALSE	swabbing	Bd	MVZ129030	PreservedSpecimen		MVZ		129030						wild										Cueva de La Iglesia, Ahuacatlan		quantitative PCR											Mexico	San Luis Potosi
Sean Rovito	Mizraim Olivares Miranda	883	-99.0503	21.3206	1975-05-04	magnipes	Chiropterotriton	FALSE	FALSE	swabbing	Bd	MVZ129031	PreservedSpecimen		MVZ		129031						wild										Cueva de La Iglesia, Ahuacatlan		quantitative PCR											Mexico	San Luis Potosi
Sean Rovito	Mizraim Olivares Miranda	883	-99.0503	21.3206	1975-05-04	magnipes	Chiropterotriton	FALSE	FALSE	swabbing	Bd	MVZ129032	PreservedSpecimen		MVZ		129032						wild										Cueva de La Iglesia, Ahuacatlan		quantitative PCR											Mexico	San Luis Potosi
Sean Rovito	Mizraim Olivares Miranda	883	-99.0503	21.3206	1975-05-04	magnipes	Chiropterotriton	FALSE	FALSE	swabbing	Bd	MVZ129033	PreservedSpecimen		MVZ		129033						wild										Cueva de La Iglesia, Ahuacatlan		quantitative PCR											Mexico	San Luis Potosi
Sean Rovito	Mizraim Olivares Miranda	883	-99.0503	21.3206	1975-05-04	magnipes	Chiropterotriton	FALSE	FALSE	swabbing	Bd	MVZ129034	PreservedSpecimen		MVZ		129034						wild										Cueva de La Iglesia, Ahuacatlan		quantitative PCR											Mexico	San Luis Potosi
Sean Rovito	Mizraim Olivares Miranda	883	-99.0503	21.3206	1975-05-04	magnipes	Chiropterotriton	FALSE	FALSE	swabbing	Bd	MVZ129035	PreservedSpecimen		MVZ		129035						wild										Cueva de La Iglesia, Ahuacatlan		quantitative PCR											Mexico	San Luis Potosi
Sean Rovito	Mizraim Olivares Miranda	883	-99.0503	21.3206	1975-05-04	magnipes	Chiropterotriton	FALSE	FALSE	swabbing	Bd	MVZ129037	PreservedSpecimen		MVZ		129037						wild										Cueva de La Iglesia, Ahuacatlan		quantitative PCR											Mexico	San Luis Potosi
Sean Rovito	Mizraim Olivares Miranda	883	-99.0503	21.3206	1975-05-04	magnipes	Chiropterotriton	FALSE	FALSE	swabbing	Bd	MVZ129038	PreservedSpecimen		MVZ		129038						wild										Cueva de La Iglesia, Ahuacatlan		quantitative PCR											Mexico	San Luis Potosi
Sean Rovito	Mizraim Olivares Miranda	883	-99.0503	21.3206	1975-05-04	magnipes	Chiropterotriton	FALSE	FALSE	swabbing	Bd	MVZ129038	PreservedSpecimen		MVZ		129038						wild										Cueva de La Iglesia, Ahuacatlan		quantitative PCR											Mexico	San Luis Potosi
Sean Rovito	Mizraim Olivares Miranda	883	-99.0503	21.3206	1975-05-04	magnipes	Chiropterotriton	FALSE	FALSE	swabbing	Bd	MVZ129039	PreservedSpecimen		MVZ		129039						wild										Cueva de La Iglesia, Ahuacatlan		quantitative PCR											Mexico	San Luis Potosi
Sean Rovito	Mizraim Olivares Miranda	883	-99.0503	21.3206	1975-05-04	magnipes	Chiropterotriton	FALSE	FALSE	swabbing	Bd	MVZ129040	PreservedSpecimen		MVZ		129040						wild										Cueva de La Iglesia, Ahuacatlan		quantitative PCR											Mexico	San Luis Potosi
Sean Rovito	Mizraim Olivares Miranda	883	-99.0503	21.3206	1975-05-04	magnipes	Chiropterotriton	FALSE	FALSE	swabbing	Bd	MVZ129041	PreservedSpecimen		MVZ		129041						wild										Cueva de La Iglesia, Ahuacatlan		quantitative PCR											Mexico	San Luis Potosi
Sean Rovito	Mizraim Olivares Miranda	883	-99.0503	21.3206	1975-05-04	magnipes	Chiropterotriton	FALSE	FALSE	swabbing	Bd	MVZ129043	PreservedSpecimen		MVZ		129043						wild										Cueva de La Iglesia, Ahuacatlan		quantitative PCR											Mexico	San Luis Potosi
Sean Rovito	Mizraim Olivares Miranda	883	-99.0503	21.3206	1975-05-04	magnipes	Chiropterotriton	FALSE	FALSE	swabbing	Bd	MVZ129045	PreservedSpecimen		MVZ		129045						wild										Cueva de La Iglesia, Ahuacatlan		quantitative PCR											Mexico	San Luis Potosi
Sean Rovito	Mizraim Olivares Miranda	883	-99.0503	21.3206	1975-05-04	magnipes	Chiropterotriton	FALSE	FALSE	swabbing	Bd	MVZ129046	PreservedSpecimen		MVZ		129046						wild										Cueva de La Iglesia, Ahuacatlan		quantitative PCR											Mexico	San Luis Potosi
Sean Rovito	Mizraim Olivares Miranda	883	-99.0503	21.3206	1975-05-04	magnipes	Chiropterotriton	FALSE	FALSE	swabbing	Bd	MVZ129047	PreservedSpecimen		MVZ		129047						wild										Cueva de La Iglesia, Ahuacatlan		quantitative PCR											Mexico	San Luis Potosi
Sean Rovito	Mizraim Olivares Miranda	883	-99.0503	21.3206	1975-05-04	magnipes	Chiropterotriton	FALSE	FALSE	swabbing	Bd	MVZ129048	PreservedSpecimen		MVZ		129048						wild										Cueva de La Iglesia, Ahuacatlan		quantitative PCR											Mexico	San Luis Potosi
Sean Rovito	Mizraim Olivares Miranda	3119	-99.1572	21.2636	1979-08-23	magnipes	Chiropterotriton	FALSE	FALSE	swabbing	Bd	MVZ163965	PreservedSpecimen		MVZ		163965						wild										small cave 500 m N Mexico Hwy. 120, 3.4 km W (by road) El Madrono		quantitative PCR											Mexico	Queretaro
Sean Rovito	Mizraim Olivares Miranda	3119	-99.1572	21.2636	1979-08-23	magnipes	Chiropterotriton	FALSE	FALSE	swabbing	Bd	MVZ163964	PreservedSpecimen		MVZ		163964						wild										small cave 500 m N Mexico Hwy. 120, 3.4 km W (by road) El Madrono		quantitative PCR											Mexico	Queretaro
Sean Rovito	Mizraim Olivares Miranda	3119	-99.1572	21.2636	1979-08-23	magnipes	Chiropterotriton	FALSE	FALSE	swabbing	Bd	MVZ163966	PreservedSpecimen		MVZ		163966						wild										small cave 500 m N Mexico Hwy. 120, 3.4 km W (by road) El Madrono		quantitative PCR											Mexico	Queretaro
Sean Rovito	Mizraim Olivares Miranda	1392	-99.1619	21.2656	1981-10-28	magnipes	Chiropterotriton	FALSE	FALSE	swabbing	Bd	MVZ178692	PreservedSpecimen		MVZ		178692						wild										6.3 km SW (by road) El Lobo, 3.4 km SW El Madrono, Hwy. 120, cave at Parador Santa Marta		quantitative PCR											Mexico	Queretaro
Sean Rovito	Mizraim Olivares Miranda	1930	-99.0581	21.0681	1982-01-21	magnipes	Chiropterotriton	FALSE	FALSE	swabbing	Bd	MVZ178693	PreservedSpecimen		MVZ		178693						wild										Cueva de Potrerillos, ca. 1 km W of Ahuacatlan		quantitative PCR											Mexico	San Luis Potosi
Sean Rovito	Mizraim Olivares Miranda	883	-99.0503	21.3206	1981-10-28	sp.	Chiropterotriton	FALSE	TRUE	swabbing	Bd	MVZ178694	PreservedSpecimen		MVZ		178694						wild										Cueva de La Iglesia, Ahuacatlan		quantitative PCR											Mexico	San Luis Potosi
Sean Rovito	Mizraim Olivares Miranda	883	-99.0503	21.3206	1982-01-21	sp.	Chiropterotriton	FALSE	FALSE	swabbing	Bd	MVZ185970	PreservedSpecimen		MVZ		185970						wild										Cueva de La Iglesia, Ahuacatlan		quantitative PCR											Mexico	San Luis Potosi
Sean Rovito	Mizraim Olivares Miranda	883	-99.0503	21.3206	1982-01-21	sp.	Chiropterotriton	FALSE	FALSE	swabbing	Bd	MVZ185971	PreservedSpecimen		MVZ		185971						wild										Cueva de La Iglesia, Ahuacatlan		quantitative PCR											Mexico	San Luis Potosi
Sean Rovito	Mizraim Olivares Miranda	883	-99.0503	21.3206	1975-05-04	magnipes	Chiropterotriton	FALSE	TRUE	swabbing	Bd	MVZ200620	PreservedSpecimen		MVZ		200620						wild										Cueva de La Iglesia, Ahuacatlan		quantitative PCR											Mexico	San Luis Potosi
Sean Rovito	Mizraim Olivares Miranda	1930	-99.0581	21.0681	1982-09-02	magnipes	Chiropterotriton	FALSE	TRUE	swabbing	Bd	MVZ200676	PreservedSpecimen		MVZ		200676						wild										Cueva de Potrerillos, 1.1 km W of Ahuacatlan and 0.7 km N off Hwy. 120		quantitative PCR											Mexico	San Luis Potosi
Sean Rovito	Mizraim Olivares Miranda	1930	-99.0581	21.0681	1982-09-02	magnipes	Chiropterotriton	FALSE	FALSE	swabbing	Bd	MVZ200677	PreservedSpecimen		MVZ		200677						wild										Cueva de Potrerillos, 1.1 km W of Ahuacatlan and 0.7 km N off Hwy. 120		quantitative PCR											Mexico	San Luis Potosi
Sean Rovito	Mizraim Olivares Miranda	1930	-99.0581	21.0681	1982-09-02	magnipes	Chiropterotriton	FALSE	FALSE	swabbing	Bd	MVZ200678	PreservedSpecimen		MVZ		200678						wild										Cueva de Potrerillos, 1.1 km W of Ahuacatlan and 0.7 km N off Hwy. 120		quantitative PCR											Mexico	San Luis Potosi
Sean Rovito	Mizraim Olivares Miranda	883	-99.0503	21.3206	1982-09-02	sp.	Chiropterotriton	FALSE	FALSE	swabbing	Bd	MVZ201384	PreservedSpecimen		MVZ		201384						wild										Cueva de La Iglesia, Ahuacatlan		quantitative PCR											Mexico	San Luis Potosi
Sean Rovito	Mizraim Olivares Miranda	883	-99.0503	21.3206	1982-09-02	sp.	Chiropterotriton	FALSE	FALSE	swabbing	Bd	MVZ201385	PreservedSpecimen		MVZ		201385						wild										Cueva de La Iglesia, Ahuacatlan		quantitative PCR											Mexico	San Luis Potosi
Sean Rovito	Mizraim Olivares Miranda	883	-99.0503	21.3206	1982-09-02	sp.	Chiropterotriton	FALSE	FALSE	swabbing	Bd	MVZ201386	PreservedSpecimen		MVZ		201386						wild										Cueva de La Iglesia, Ahuacatlan		quantitative PCR											Mexico	San Luis Potosi
Sean Rovito	Mizraim Olivares Miranda	1930	-99.0581	21.0681	1969-12-11	magnipes	Chiropterotriton	FALSE	FALSE	swabbing	Bd	MVZ223572	PreservedSpecimen		MVZ		223572						wild										2 km W (by road and trail) Ahuacatlan, Cueva de Potrerillos		quantitative PCR											Mexico	San Luis Potosi
Sean Rovito	Mizraim Olivares Miranda	1930	-99.0581	21.0681	1969-12-11	magnipes	Chiropterotriton	FALSE	FALSE	swabbing	Bd	MVZ223573	PreservedSpecimen		MVZ		223573						wild										2 km W (by road and trail) Ahuacatlan, Cueva de Potrerillos		quantitative PCR											Mexico	San Luis Potosi
Sean Rovito	Mizraim Olivares Miranda	1930	-99.0581	21.0681	1969-12-11	magnipes	Chiropterotriton	FALSE	FALSE	swabbing	Bd	MVZ223574	PreservedSpecimen		MVZ		223574						wild										2 km W (by road and trail) Ahuacatlan, Cueva de Potrerillos		quantitative PCR											Mexico	San Luis Potosi
Sean Rovito	Mizraim Olivares Miranda	1930	-99.0581	21.0681	1969-12-11	magnipes	Chiropterotriton	FALSE	FALSE	swabbing	Bd	MVZ223575	PreservedSpecimen		MVZ		223575						wild										2 km W (by road and trail) Ahuacatlan, Cueva de Potrerillos		quantitative PCR											Mexico	San Luis Potosi
Sean Rovito	Mizraim Olivares Miranda	1930	-99.0581	21.0681	1969-12-11	magnipes	Chiropterotriton	FALSE	FALSE	swabbing	Bd	MVZ223576	PreservedSpecimen		MVZ		223576						wild										2 km W (by road and trail) Ahuacatlan, Cueva de Potrerillos		quantitative PCR											Mexico	San Luis Potosi
Sean Rovito	Mizraim Olivares Miranda	1930	-99.0581	21.0681	1969-12-11	magnipes	Chiropterotriton	FALSE	FALSE	swabbing	Bd	MVZ223577	PreservedSpecimen		MVZ		223577						wild										2 km W (by road and trail) Ahuacatlan, Cueva de Potrerillos		quantitative PCR											Mexico	San Luis Potosi
Sean Rovito	Mizraim Olivares Miranda	1930	-99.0581	21.0681	1969-12-11	magnipes	Chiropterotriton	FALSE	FALSE	swabbing	Bd	MVZ223578	PreservedSpecimen		MVZ		223578						wild										2 km W (by road and trail) Ahuacatlan, Cueva de Potrerillos		quantitative PCR											Mexico	San Luis Potosi
Sean Rovito	Mizraim Olivares Miranda	1930	-99.0581	21.0681	1969-12-11	magnipes	Chiropterotriton	FALSE	FALSE	swabbing	Bd	MVZ223579	PreservedSpecimen		MVZ		223579						wild										2 km W (by road and trail) Ahuacatlan, Cueva de Potrerillos		quantitative PCR											Mexico	San Luis Potosi
Sean Rovito	Mizraim Olivares Miranda	1930	-99.0581	21.0681	1969-12-11	magnipes	Chiropterotriton	FALSE	FALSE	swabbing	Bd	MVZ223580	PreservedSpecimen		MVZ		223580						wild										2 km W (by road and trail) Ahuacatlan, Cueva de Potrerillos		quantitative PCR											Mexico	San Luis Potosi
Sean Rovito	Mizraim Olivares Miranda	1930	-99.0581	21.0681	1969-12-11	magnipes	Chiropterotriton	FALSE	FALSE	swabbing	Bd	MVZ223581	PreservedSpecimen		MVZ		223581						wild										2 km W (by road and trail) Ahuacatlan, Cueva de Potrerillos		quantitative PCR											Mexico	San Luis Potosi
Sean Rovito	Mizraim Olivares Miranda	1930	-99.0581	21.0681	1969-12-11	magnipes	Chiropterotriton	FALSE	FALSE	swabbing	Bd	MVZ223582	PreservedSpecimen		MVZ		223582						wild										2 km W (by road and trail) Ahuacatlan, Cueva de Potrerillos		quantitative PCR											Mexico	San Luis Potosi
Sean Rovito	Mizraim Olivares Miranda	1930	-99.0581	21.0681	1969-12-11	magnipes	Chiropterotriton	FALSE	FALSE	swabbing	Bd	MVZ223583	PreservedSpecimen		MVZ		223583						wild										2 km W (by road and trail) Ahuacatlan, Cueva de Potrerillos		quantitative PCR											Mexico	San Luis Potosi
Sean Rovito	Mizraim Olivares Miranda	1930	-99.0581	21.0681	1969-12-11	magnipes	Chiropterotriton	FALSE	FALSE	swabbing	Bd	MVZ223584	PreservedSpecimen		MVZ		223584						wild										2 km W (by road and trail) Ahuacatlan, Cueva de Potrerillos		quantitative PCR											Mexico	San Luis Potosi
Sean Rovito	Mizraim Olivares Miranda	1930	-99.0581	21.0681	1969-12-11	magnipes	Chiropterotriton	FALSE	FALSE	swabbing	Bd	MVZ223585	PreservedSpecimen		MVZ		223585						wild										2 km W (by road and trail) Ahuacatlan, Cueva de Potrerillos		quantitative PCR											Mexico	San Luis Potosi
Sean Rovito	Mizraim Olivares Miranda	1930	-99.0581	21.0681	1969-12-11	magnipes	Chiropterotriton	FALSE	FALSE	swabbing	Bd	MVZ223586	PreservedSpecimen		MVZ		223586						wild										2 km W (by road and trail) Ahuacatlan, Cueva de Potrerillos		quantitative PCR											Mexico	San Luis Potosi
Sean Rovito	Mizraim Olivares Miranda	1930	-99.0581	21.0681	1969-12-11	magnipes	Chiropterotriton	FALSE	FALSE	swabbing	Bd	MVZ223587	PreservedSpecimen		MVZ		223587						wild										2 km W (by road and trail) Ahuacatlan, Cueva de Potrerillos		quantitative PCR											Mexico	San Luis Potosi
Sean Rovito	Mizraim Olivares Miranda	1930	-99.0581	21.0681	1969-12-11	magnipes	Chiropterotriton	FALSE	FALSE	swabbing	Bd	MVZ223588	PreservedSpecimen		MVZ		223588						wild										2 km W (by road and trail) Ahuacatlan, Cueva de Potrerillos		quantitative PCR											Mexico	San Luis Potosi
Sean Rovito	Mizraim Olivares Miranda	1930	-99.0581	21.0681	1969-12-11	magnipes	Chiropterotriton	FALSE	FALSE	swabbing	Bd	MVZ223589	PreservedSpecimen		MVZ		223589						wild										2 km W (by road and trail) Ahuacatlan, Cueva de Potrerillos		quantitative PCR											Mexico	San Luis Potosi
Sean Rovito	Mizraim Olivares Miranda	1930	-99.0581	21.0681	1969-12-11	magnipes	Chiropterotriton	FALSE	TRUE	swabbing	Bd	MVZ223590	PreservedSpecimen		MVZ		223590						wild										2 km W (by road and trail) Ahuacatlan, Cueva de Potrerillos		quantitative PCR											Mexico	San Luis Potosi
Sean Rovito	Mizraim Olivares Miranda	1930	-99.0581	21.0681	1969-12-11	magnipes	Chiropterotriton	FALSE	FALSE	swabbing	Bd	MVZ223591	PreservedSpecimen		MVZ		223591						wild										2 km W (by road and trail) Ahuacatlan, Cueva de Potrerillos		quantitative PCR											Mexico	San Luis Potosi
Sean Rovito	Mizraim Olivares Miranda	1930	-99.0581	21.0681	1969-12-11	magnipes	Chiropterotriton	FALSE	FALSE	swabbing	Bd	MVZ223592	PreservedSpecimen		MVZ		223592						wild										2 km W (by road and trail) Ahuacatlan, Cueva de Potrerillos		quantitative PCR											Mexico	San Luis Potosi
Sean Rovito	Mizraim Olivares Miranda	1930	-99.0581	21.0681	1969-12-11	magnipes	Chiropterotriton	FALSE	FALSE	swabbing	Bd	MVZ223593	PreservedSpecimen		MVZ		223593						wild										2 km W (by road and trail) Ahuacatlan, Cueva de Potrerillos		quantitative PCR											Mexico	San Luis Potosi
Sean Rovito	Mizraim Olivares Miranda	1930	-99.0581	21.0681	1969-12-11	magnipes	Chiropterotriton	FALSE	FALSE	swabbing	Bd	MVZ223594	PreservedSpecimen		MVZ		223594						wild										2 km W (by road and trail) Ahuacatlan, Cueva de Potrerillos		quantitative PCR											Mexico	San Luis Potosi
Sean Rovito	Mizraim Olivares Miranda	1930	-99.0581	21.0681	1969-12-11	magnipes	Chiropterotriton	FALSE	FALSE	swabbing	Bd	MVZ223595	PreservedSpecimen		MVZ		223595						wild										2 km W (by road and trail) Ahuacatlan, Cueva de Potrerillos		quantitative PCR											Mexico	San Luis Potosi
Sean Rovito	Mizraim Olivares Miranda	1930	-99.0581	21.0681	1969-12-11	magnipes	Chiropterotriton	FALSE	FALSE	swabbing	Bd	MVZ223596	PreservedSpecimen		MVZ		223596						wild										2 km W (by road and trail) Ahuacatlan, Cueva de Potrerillos		quantitative PCR											Mexico	San Luis Potosi
Sean Rovito	Mizraim Olivares Miranda	1930	-99.0581	21.0681	1969-12-11	magnipes	Chiropterotriton	FALSE	FALSE	swabbing	Bd	MVZ223597	PreservedSpecimen		MVZ		223597						wild										2 km W (by road and trail) Ahuacatlan, Cueva de Potrerillos		quantitative PCR											Mexico	San Luis Potosi
Sean Rovito	Mizraim Olivares Miranda	1930	-99.0581	21.0681	1969-12-11	magnipes	Chiropterotriton	FALSE	FALSE	swabbing	Bd	MVZ223598	PreservedSpecimen		MVZ		223598						wild										2 km W (by road and trail) Ahuacatlan, Cueva de Potrerillos		quantitative PCR											Mexico	San Luis Potosi
Sean Rovito	Mizraim Olivares Miranda	1930	-99.0581	21.0681	1969-12-11	magnipes	Chiropterotriton	FALSE	FALSE	swabbing	Bd	MVZ223599	PreservedSpecimen		MVZ		223599						wild										2 km W (by road and trail) Ahuacatlan, Cueva de Potrerillos		quantitative PCR											Mexico	San Luis Potosi
Sean Rovito	Mizraim Olivares Miranda	1930	-99.0581	21.0681	1969-12-11	magnipes	Chiropterotriton	FALSE	FALSE	swabbing	Bd	MVZ223600	PreservedSpecimen		MVZ		223600						wild										2 km W (by road and trail) Ahuacatlan, Cueva de Potrerillos		quantitative PCR											Mexico	San Luis Potosi
Sean Rovito	Mizraim Olivares Miranda	1930	-99.0581	21.0681	1969-12-11	magnipes	Chiropterotriton	FALSE	FALSE	swabbing	Bd	MVZ223601	PreservedSpecimen		MVZ		223601						wild										2 km W (by road and trail) Ahuacatlan, Cueva de Potrerillos		quantitative PCR											Mexico	San Luis Potosi
Sean Rovito	Mizraim Olivares Miranda	1930	-99.0581	21.0681	1969-12-11	magnipes	Chiropterotriton	FALSE	FALSE	swabbing	Bd	MVZ223602	PreservedSpecimen		MVZ		223602						wild										2 km W (by road and trail) Ahuacatlan, Cueva de Potrerillos		quantitative PCR											Mexico	San Luis Potosi
Sean Rovito	Mizraim Olivares Miranda	1930	-99.0581	21.0681	1969-12-11	magnipes	Chiropterotriton	FALSE	FALSE	swabbing	Bd	MVZ223603	PreservedSpecimen		MVZ		223603						wild										2 km W (by road and trail) Ahuacatlan, Cueva de Potrerillos		quantitative PCR											Mexico	San Luis Potosi
Sean Rovito	Mizraim Olivares Miranda	1930	-99.0581	21.0681	1969-12-11	magnipes	Chiropterotriton	FALSE	FALSE	swabbing	Bd	MVZ223603	PreservedSpecimen		MVZ		223603						wild										2 km W (by road and trail) Ahuacatlan, Cueva de Potrerillos		quantitative PCR											Mexico	San Luis Potosi
Sean Rovito	Mizraim Olivares Miranda	1930	-99.0581	21.0681	1969-12-11	magnipes	Chiropterotriton	FALSE	FALSE	swabbing	Bd	MVZ223604	PreservedSpecimen		MVZ		223604						wild										2 km W (by road and trail) Ahuacatlan, Cueva de Potrerillos		quantitative PCR											Mexico	San Luis Potosi
Sean Rovito	Mizraim Olivares Miranda	1930	-99.0581	21.0681	1969-12-11	magnipes	Chiropterotriton	FALSE	FALSE	swabbing	Bd	MVZ223606	PreservedSpecimen		MVZ		223606						wild										2 km W (by road and trail) Ahuacatlan, Cueva de Potrerillos		quantitative PCR											Mexico	San Luis Potosi
Sean Rovito	Mizraim Olivares Miranda	1930	-99.0581	21.0681	1969-12-11	magnipes	Chiropterotriton	FALSE	FALSE	swabbing	Bd	MVZ223607	PreservedSpecimen		MVZ		223607						wild										2 km W (by road and trail) Ahuacatlan, Cueva de Potrerillos		quantitative PCR											Mexico	San Luis Potosi
Sean Rovito	Mizraim Olivares Miranda	1930	-99.0581	21.0681	1969-12-11	magnipes	Chiropterotriton	FALSE	FALSE	swabbing	Bd	MVZ223608	PreservedSpecimen		MVZ		223608						wild										2 km W (by road and trail) Ahuacatlan, Cueva de Potrerillos		quantitative PCR											Mexico	San Luis Potosi
Sean Rovito	Mizraim Olivares Miranda	1930	-99.0581	21.0681	1969-12-11	magnipes	Chiropterotriton	FALSE	FALSE	swabbing	Bd	MVZ223609	PreservedSpecimen		MVZ		223609						wild										2 km W (by road and trail) Ahuacatlan, Cueva de Potrerillos		quantitative PCR											Mexico	San Luis Potosi
Sean Rovito	Mizraim Olivares Miranda	1930	-99.0581	21.0681	1969-12-11	magnipes	Chiropterotriton	FALSE	FALSE	swabbing	Bd	MVZ223610	PreservedSpecimen		MVZ		223610						wild										2 km W (by road and trail) Ahuacatlan, Cueva de Potrerillos		quantitative PCR											Mexico	San Luis Potosi
Sean Rovito	Mizraim Olivares Miranda	1930	-99.0581	21.0681	1969-12-11	magnipes	Chiropterotriton	FALSE	FALSE	swabbing	Bd	MVZ223611	PreservedSpecimen		MVZ		223611						wild										2 km W (by road and trail) Ahuacatlan, Cueva de Potrerillos		quantitative PCR											Mexico	San Luis Potosi
Sean Rovito	Mizraim Olivares Miranda	1930	-99.0581	21.0681	1969-12-11	magnipes	Chiropterotriton	FALSE	FALSE	swabbing	Bd	MVZ223612	PreservedSpecimen		MVZ		223612						wild										2 km W (by road and trail) Ahuacatlan, Cueva de Potrerillos		quantitative PCR											Mexico	San Luis Potosi
Sean Rovito	Mizraim Olivares Miranda	1930	-99.0581	21.0681	1969-12-11	magnipes	Chiropterotriton	FALSE	FALSE	swabbing	Bd	MVZ223613	PreservedSpecimen		MVZ		223613						wild										2 km W (by road and trail) Ahuacatlan, Cueva de Potrerillos		quantitative PCR											Mexico	San Luis Potosi
Sean Rovito	Mizraim Olivares Miranda	1930	-99.0581	21.0681	1969-12-11	magnipes	Chiropterotriton	FALSE	FALSE	swabbing	Bd	MVZ223614	PreservedSpecimen		MVZ		223614						wild										2 km W (by road and trail) Ahuacatlan, Cueva de Potrerillos		quantitative PCR											Mexico	San Luis Potosi
Sean Rovito	Mizraim Olivares Miranda	9	-99.2262	20.8881	2012-06-08	magnipes	Chiropterotriton	FALSE	FALSE	swabbing	Bd	MVZ269536	PreservedSpecimen		MVZ		269536						wild										"El Coni", 900 m SSE of center of Durango, Parque Nacional los Marrmoles		quantitative PCR											Mexico	Hidalgo
Sean Rovito	Mizraim Olivares Miranda	2000	-99.1686	21.264	1968-09-01	magnipes	Chiropterotriton	FALSE	FALSE	swabbing	Bd	TCWC27665	PreservedSpecimen		TCWC		27665						wild										2.2 mi W Madronos		quantitative PCR											Mexico	Queretaro
Sean Rovito	Mizraim Olivares Miranda	2000	-99.1686	21.264	1968-09-01	magnipes	Chiropterotriton	FALSE	FALSE	swabbing	Bd	TCWC27666	PreservedSpecimen		TCWC		27666						wild										2.2 mi W Madronos		quantitative PCR											Mexico	Queretaro
Sean Rovito	Mizraim Olivares Miranda	2000	-99.1686	21.264	1968-09-01	magnipes	Chiropterotriton	FALSE	FALSE	swabbing	Bd	TCWC27667	PreservedSpecimen		TCWC		27667						wild										2.2 mi W Madronos		quantitative PCR											Mexico	Queretaro
Sean Rovito	Mizraim Olivares Miranda	2000	-99.1686	21.264	1968-09-01	magnipes	Chiropterotriton	FALSE	FALSE	swabbing	Bd	TCWC27668	PreservedSpecimen		TCWC		27668						wild										2.2 mi W Madronos		quantitative PCR											Mexico	Queretaro
Sean Rovito	Mizraim Olivares Miranda	2000	-99.1686	21.264	1968-09-01	magnipes	Chiropterotriton	FALSE	FALSE	swabbing	Bd	TCWC27669	PreservedSpecimen		TCWC		27669						wild										2.2 mi W Madronos		quantitative PCR											Mexico	Queretaro
Sean Rovito	Mizraim Olivares Miranda	2000	-99.1686	21.264	1968-09-01	magnipes	Chiropterotriton	FALSE	FALSE	swabbing	Bd	TCWC27670	PreservedSpecimen		TCWC		27670						wild										2.2 mi W Madronos		quantitative PCR											Mexico	Queretaro
Sean Rovito	Mizraim Olivares Miranda	2000	-99.1686	21.264	1968-09-01	magnipes	Chiropterotriton	FALSE	FALSE	swabbing	Bd	TCWC27671	PreservedSpecimen		TCWC		27671						wild										2.2 mi W Madronos		quantitative PCR											Mexico	Queretaro
Sean Rovito	Mizraim Olivares Miranda	2000	-99.1686	21.264	1968-09-01	magnipes	Chiropterotriton	FALSE	FALSE	swabbing	Bd	TCWC27672	PreservedSpecimen		TCWC		27672						wild										2.2 mi W Madronos		quantitative PCR											Mexico	Queretaro
Sean Rovito	Mizraim Olivares Miranda	2000	-99.1686	21.264	1968-09-01	magnipes	Chiropterotriton	FALSE	FALSE	swabbing	Bd	TCWC27673	PreservedSpecimen		TCWC		27673						wild										2.2 mi W Madronos		quantitative PCR											Mexico	Queretaro
Sean Rovito	Mizraim Olivares Miranda	2000	-99.1686	21.264	1968-09-01	magnipes	Chiropterotriton	FALSE	FALSE	swabbing	Bd	TCWC27674	PreservedSpecimen		TCWC		27674						wild										2.2 mi W Madronos		quantitative PCR											Mexico	Queretaro
Sean Rovito	Mizraim Olivares Miranda	2000	-99.1686	21.264	1968-09-01	magnipes	Chiropterotriton	FALSE	FALSE	swabbing	Bd	TCWC27675	PreservedSpecimen		TCWC		27675						wild										2.2 mi W Madronos		quantitative PCR											Mexico	Queretaro
Sean Rovito	Mizraim Olivares Miranda	2000	-99.1686	21.264	1968-09-01	magnipes	Chiropterotriton	FALSE	FALSE	swabbing	Bd	TCWC27676	PreservedSpecimen		TCWC		27676						wild										2.2 mi W Madronos		quantitative PCR											Mexico	Queretaro
Sean Rovito	Mizraim Olivares Miranda	2000	-99.1686	21.264	1968-09-01	magnipes	Chiropterotriton	FALSE	FALSE	swabbing	Bd	TCWC27677	PreservedSpecimen		TCWC		27677						wild										2.2 mi W Madronos		quantitative PCR											Mexico	Queretaro
Sean Rovito	Mizraim Olivares Miranda	2000	-99.1686	21.264	1968-09-01	magnipes	Chiropterotriton	FALSE	FALSE	swabbing	Bd	TCWC27678	PreservedSpecimen		TCWC		27678						wild										2.2 mi W Madronos		quantitative PCR											Mexico	Queretaro
Sean Rovito	Mizraim Olivares Miranda	2000	-99.1686	21.264	1968-09-01	magnipes	Chiropterotriton	FALSE	FALSE	swabbing	Bd	TCWC27681	PreservedSpecimen		TCWC		27681						wild										2.2 mi W Madronos		quantitative PCR											Mexico	Queretaro
Sean Rovito	Mizraim Olivares Miranda	2000	-99.1686	21.264	1968-09-01	magnipes	Chiropterotriton	FALSE	FALSE	swabbing	Bd	TCWC27683	PreservedSpecimen		TCWC		27683						wild										2.2 mi W Madronos		quantitative PCR											Mexico	Queretaro
Sean Rovito	Mizraim Olivares Miranda	2000	-99.1686	21.264	1968-09-01	magnipes	Chiropterotriton	FALSE	FALSE	swabbing	Bd	TCWC27684	PreservedSpecimen		TCWC		27684						wild										2.2 mi W Madronos		quantitative PCR											Mexico	Queretaro
Sean Rovito	Mizraim Olivares Miranda	2000	-99.1686	21.264	1968-09-01	magnipes	Chiropterotriton	FALSE	FALSE	swabbing	Bd	TCWC27685	PreservedSpecimen		TCWC		27685						wild										2.2 mi W Madronos		quantitative PCR											Mexico	Queretaro
Sean Rovito	Mizraim Olivares Miranda	2000	-99.1686	21.264	1968-09-01	magnipes	Chiropterotriton	FALSE	FALSE	swabbing	Bd	TCWC27686	PreservedSpecimen		TCWC		27686						wild										2.2 mi W Madronos		quantitative PCR											Mexico	Queretaro
Sean Rovito	Mizraim Olivares Miranda	2000	-99.1686	21.264	1968-09-01	magnipes	Chiropterotriton	FALSE	FALSE	swabbing	Bd	TCWC27688	PreservedSpecimen		TCWC		27688						wild										2.2 mi W Madronos		quantitative PCR											Mexico	Queretaro
Sean Rovito	Mizraim Olivares Miranda	2000	-99.1686	21.264	1968-09-01	magnipes	Chiropterotriton	FALSE	FALSE	swabbing	Bd	TCWC27689	PreservedSpecimen		TCWC		27689						wild										2.2 mi W Madronos		quantitative PCR											Mexico	Queretaro
Sean Rovito	Mizraim Olivares Miranda	2000	-99.1686	21.264	1968-09-01	magnipes	Chiropterotriton	FALSE	FALSE	swabbing	Bd	TCWC27690	PreservedSpecimen		TCWC		27690						wild										2.2 mi W Madronos		quantitative PCR											Mexico	Queretaro
Sean Rovito	Mizraim Olivares Miranda	2000	-99.1686	21.264	1968-09-01	magnipes	Chiropterotriton	FALSE	FALSE	swabbing	Bd	TCWC27691	PreservedSpecimen		TCWC		27691						wild										2.2 mi W Madronos		quantitative PCR											Mexico	Queretaro
Sean Rovito	Mizraim Olivares Miranda	2000	-99.1686	21.264	1968-09-01	magnipes	Chiropterotriton	FALSE	FALSE	swabbing	Bd	TCWC27692	PreservedSpecimen		TCWC		27692						wild										2.2 mi W Madronos		quantitative PCR											Mexico	Queretaro
Sean Rovito	Mizraim Olivares Miranda	2000	-99.1686	21.264	1968-09-01	magnipes	Chiropterotriton	FALSE	FALSE	swabbing	Bd	TCWC27694	PreservedSpecimen		TCWC		27694						wild										2.2 mi W Madronos		quantitative PCR											Mexico	Queretaro
Sean Rovito	Mizraim Olivares Miranda	2000	-99.1686	21.264	1968-09-01	magnipes	Chiropterotriton	FALSE	FALSE	swabbing	Bd	TCWC27695	PreservedSpecimen		TCWC		27695						wild										2.2 mi W Madronos		quantitative PCR											Mexico	Queretaro
Sean Rovito	Mizraim Olivares Miranda	2000	-99.1686	21.264	1968-09-01	magnipes	Chiropterotriton	FALSE	FALSE	swabbing	Bd	TCWC27695	PreservedSpecimen		TCWC		27695						wild										2.2 mi W Madronos		quantitative PCR											Mexico	Queretaro
Sean Rovito	Mizraim Olivares Miranda	2000	-99.1686	21.264	1968-09-02	magnipes	Chiropterotriton	FALSE	FALSE	swabbing	Bd	TCWC27696	PreservedSpecimen		TCWC		27696						wild										2.2 mi W Madronos		quantitative PCR											Mexico	Queretaro
Sean Rovito	Mizraim Olivares Miranda	2000	-99.1686	21.264	1968-09-01	magnipes	Chiropterotriton	FALSE	FALSE	swabbing	Bd	TCWC27697	PreservedSpecimen		TCWC		27697						wild										2.2 mi W Madronos		quantitative PCR											Mexico	Queretaro
Sean Rovito	Mizraim Olivares Miranda	2000	-99.1686	21.264	1968-09-01	magnipes	Chiropterotriton	FALSE	FALSE	swabbing	Bd	TCWC27698	PreservedSpecimen		TCWC		27698						wild										2.2 mi W Madronos		quantitative PCR											Mexico	Queretaro
Sean Rovito	Mizraim Olivares Miranda	2000	-99.1686	21.264	1968-09-03	magnipes	Chiropterotriton	FALSE	FALSE	swabbing	Bd	TCWC27699	PreservedSpecimen		TCWC		27699						wild										2.2 mi W Madronos		quantitative PCR											Mexico	Queretaro
Sean Rovito	Mizraim Olivares Miranda	2000	-99.1686	21.264	1968-09-03	magnipes	Chiropterotriton	FALSE	FALSE	swabbing	Bd	TCWC27700	PreservedSpecimen		TCWC		27700						wild										2.2 mi W Madronos		quantitative PCR											Mexico	Queretaro
Sean Rovito	Mizraim Olivares Miranda	2000	-99.1686	21.264	1968-09-01	magnipes	Chiropterotriton	FALSE	FALSE	swabbing	Bd	TCWC27701	PreservedSpecimen		TCWC		27701						wild										2.2 mi W Madronos		quantitative PCR											Mexico	Queretaro
Sean Rovito	Mizraim Olivares Miranda	2000	-99.1686	21.264	1968-09-01	magnipes	Chiropterotriton	FALSE	FALSE	swabbing	Bd	TCWC27702	PreservedSpecimen		TCWC		27702						wild										2.2 mi W Madronos		quantitative PCR											Mexico	Queretaro
Sean Rovito	Mizraim Olivares Miranda	2000	-99.1686	21.264	1968-09-03	magnipes	Chiropterotriton	FALSE	FALSE	swabbing	Bd	TCWC27703	PreservedSpecimen		TCWC		27703						wild										2.2 mi W Madronos		quantitative PCR											Mexico	Queretaro
Sean Rovito	Mizraim Olivares Miranda	2000	-99.1686	21.264	1968-09-03	magnipes	Chiropterotriton	FALSE	FALSE	swabbing	Bd	TCWC27704	PreservedSpecimen		TCWC		27704						wild										2.2 mi W Madronos		quantitative PCR											Mexico	Queretaro
Sean Rovito	Mizraim Olivares Miranda	2000	-99.1686	21.264	1968-09-03	magnipes	Chiropterotriton	FALSE	FALSE	swabbing	Bd	TCWC27705	PreservedSpecimen		TCWC		27705						wild										2.2 mi W Madronos		quantitative PCR											Mexico	Queretaro
Sean Rovito	Mizraim Olivares Miranda	2000	-99.1686	21.264	1968-09-03	magnipes	Chiropterotriton	FALSE	FALSE	swabbing	Bd	TCWC27706	PreservedSpecimen		TCWC		27706						wild										2.2 mi W Madronos		quantitative PCR											Mexico	Queretaro
Sean Rovito	Mizraim Olivares Miranda	2000	-99.1686	21.264	1968-09-01	magnipes	Chiropterotriton	FALSE	FALSE	swabbing	Bd	TCWC27707	PreservedSpecimen		TCWC		27707						wild										2.2 mi W Madronos		quantitative PCR											Mexico	Queretaro
Sean Rovito	Mizraim Olivares Miranda	2000	-99.1686	21.264	1968-09-03	magnipes	Chiropterotriton	FALSE	FALSE	swabbing	Bd	TCWC27708	PreservedSpecimen		TCWC		27708						wild										2.2 mi W Madronos		quantitative PCR											Mexico	Queretaro
Sean Rovito	Mizraim Olivares Miranda	2000	-99.1804	21.2692	1969-07-3	magnipes	Chiropterotriton	FALSE	FALSE	swabbing	Bd	TCWC29996	PreservedSpecimen		TCWC		29996						wild										2.4 mi W El Madrono		quantitative PCR											Mexico	Queretaro
Sean Rovito	Mizraim Olivares Miranda	2000	-99.1804	21.2692	1969-03-13	magnipes	Chiropterotriton	FALSE	FALSE	swabbing	Bd	TCWC29998	PreservedSpecimen		TCWC		29998						wild										2.4 mi W El Madrono		quantitative PCR											Mexico	Queretaro
Sean Rovito	Mizraim Olivares Miranda	2000	-99.1804	21.2692	1969-07-22	magnipes	Chiropterotriton	FALSE	FALSE	swabbing	Bd	TCWC29999	PreservedSpecimen		TCWC		29999						wild										2.4 mi W El Madrono		quantitative PCR											Mexico	Queretaro
Sean Rovito	Mizraim Olivares Miranda	2000	-99.1804	21.2692	1969-07-22	magnipes	Chiropterotriton	FALSE	FALSE	swabbing	Bd	TCWC30011	PreservedSpecimen		TCWC		30011						wild										2.4 mi W El Madrono		quantitative PCR											Mexico	Queretaro
Sean Rovito	Mizraim Olivares Miranda	2000	-99.1804	21.2692	1969-08-14	magnipes	Chiropterotriton	FALSE	FALSE	swabbing	Bd	TCWC30012	PreservedSpecimen		TCWC		30012						wild										2.4 mi W El Madrono		quantitative PCR											Mexico	Queretaro
Sean Rovito	Mizraim Olivares Miranda	2000	-99.1804	21.2692	1969-08-15	magnipes	Chiropterotriton	FALSE	FALSE	swabbing	Bd	TCWC30022	PreservedSpecimen		TCWC		30022						wild										2.4 mi W El Madrono		quantitative PCR											Mexico	Queretaro
Sean Rovito	Mizraim Olivares Miranda	2000	-99.1804	21.2692	1969-08-15	magnipes	Chiropterotriton	FALSE	FALSE	swabbing	Bd	TCWC30028	PreservedSpecimen		TCWC		30028						wild										2.4 mi W El Madrono		quantitative PCR											Mexico	Queretaro
Sean Rovito	Mizraim Olivares Miranda	2000	-99.1804	21.2692	1969-07-22	magnipes	Chiropterotriton	FALSE	FALSE	swabbing	Bd	TCWC30085	PreservedSpecimen		TCWC		30085						wild										2.4 mi W El Madrono		quantitative PCR											Mexico	Queretaro
Sean Rovito	Mizraim Olivares Miranda	2000	-99.1804	21.2692	1969-07-22	magnipes	Chiropterotriton	FALSE	FALSE	swabbing	Bd	TCWC30086	PreservedSpecimen		TCWC		30086						wild										2.4 mi W El Madrono		quantitative PCR											Mexico	Queretaro
Sean Rovito	Mizraim Olivares Miranda	2000	-99.1804	21.2692	1969-07-22	magnipes	Chiropterotriton	FALSE	FALSE	swabbing	Bd	TCWC30087	PreservedSpecimen		TCWC		30087						wild										2.4 mi W El Madrono		quantitative PCR											Mexico	Queretaro
Sean Rovito	Mizraim Olivares Miranda	1100	-99.1592	21.2725	1971-04-15	magnipes	Chiropterotriton	FALSE	FALSE	swabbing	Bd	TCWC36028	PreservedSpecimen		TCWC		36028						wild										3.1 mi W El Lobo		quantitative PCR											Mexico	Queretaro
Sean Rovito	Mizraim Olivares Miranda	1100	-99.1592	21.2725	1971-04-15	magnipes	Chiropterotriton	FALSE	FALSE	swabbing	Bd	TCWC36029	PreservedSpecimen		TCWC		36029						wild										3.1 mi W El Lobo		quantitative PCR											Mexico	Queretaro
Sean Rovito	Mizraim Olivares Miranda	1100	-99.1592	21.2725	1971-04-15	magnipes	Chiropterotriton	FALSE	FALSE	swabbing	Bd	TCWC36030	PreservedSpecimen		TCWC		36030						wild										3.1 mi W El Lobo		quantitative PCR											Mexico	Queretaro
Sean Rovito	Mizraim Olivares Miranda	1100	-99.1592	21.2725	1971-04-15	magnipes	Chiropterotriton	FALSE	FALSE	swabbing	Bd	TCWC36031	PreservedSpecimen		TCWC		36031						wild										3.1 mi W El Lobo		quantitative PCR											Mexico	Queretaro
Sean Rovito	Mizraim Olivares Miranda	1100	-99.1592	21.2725	1971-04-15	magnipes	Chiropterotriton	FALSE	FALSE	swabbing	Bd	TCWC36032	PreservedSpecimen		TCWC		36032						wild										3.1 mi W El Lobo		quantitative PCR											Mexico	Queretaro
Sean Rovito	Mizraim Olivares Miranda	1100	-99.1592	21.2725	1971-04-15	magnipes	Chiropterotriton	FALSE	FALSE	swabbing	Bd	TCWC36033	PreservedSpecimen		TCWC		36033						wild										3.1 mi W El Lobo		quantitative PCR											Mexico	Queretaro
Sean Rovito	Mizraim Olivares Miranda	1100	-99.1592	21.2725	1971-04-15	magnipes	Chiropterotriton	FALSE	FALSE	swabbing	Bd	TCWC36034	PreservedSpecimen		TCWC		36034						wild										3.1 mi W El Lobo		quantitative PCR											Mexico	Queretaro
Sean Rovito	Mizraim Olivares Miranda	1100	-99.1592	21.2725	1971-04-15	magnipes	Chiropterotriton	FALSE	FALSE	swabbing	Bd	TCWC36035	PreservedSpecimen		TCWC		36035						wild										3.1 mi W El Lobo		quantitative PCR											Mexico	Queretaro
Sean Rovito	Mizraim Olivares Miranda	1100	-99.1595	21.2719	1969-08-19	magnipes	Chiropterotriton	FALSE	FALSE	swabbing	Bd	TCWC30073	PreservedSpecimen		TCWC		30073						wild										3.2 mi W El Lobo		quantitative PCR											Mexico	Queretaro
Sean Rovito	Mizraim Olivares Miranda	1100	-99.1595	21.2719	1969-12-23	magnipes	Chiropterotriton	FALSE	FALSE	swabbing	Bd	TCWC30562	PreservedSpecimen		TCWC		30562						wild										3.2 mi W El Lobo		quantitative PCR											Mexico	Queretaro
Sean Rovito	Mizraim Olivares Miranda	1100	-99.1595	21.2719	1969-12-23	magnipes	Chiropterotriton	FALSE	FALSE	swabbing	Bd	TCWC30563	PreservedSpecimen		TCWC		30563						wild										3.2 mi W El Lobo		quantitative PCR											Mexico	Queretaro
Sean Rovito	Mizraim Olivares Miranda	1100	-99.1595	21.2719	1969-12-23	magnipes	Chiropterotriton	FALSE	FALSE	swabbing	Bd	TCWC30564	PreservedSpecimen		TCWC		30564						wild										3.2 mi W El Lobo		quantitative PCR											Mexico	Queretaro
Sean Rovito	Mizraim Olivares Miranda	1100	-99.1595	21.2719	1969-12-23	magnipes	Chiropterotriton	FALSE	FALSE	swabbing	Bd	TCWC30570	PreservedSpecimen		TCWC		30570						wild										3.2 mi W El Lobo		quantitative PCR											Mexico	Queretaro
Sean Rovito	Mizraim Olivares Miranda	1100	-99.1595	21.2719	1969-12-23	magnipes	Chiropterotriton	FALSE	FALSE	swabbing	Bd	TCWC30572	PreservedSpecimen		TCWC		30572						wild										3.2 mi W El Lobo		quantitative PCR											Mexico	Queretaro
Sean Rovito	Mizraim Olivares Miranda	1100	-99.1595	21.2719	1969-12-26	magnipes	Chiropterotriton	FALSE	FALSE	swabbing	Bd	TCWC30574	PreservedSpecimen		TCWC		30574						wild										3.2 mi W El Lobo		quantitative PCR											Mexico	Queretaro
Sean Rovito	Mizraim Olivares Miranda	1100	-99.1595	21.2719	1969-12-26	magnipes	Chiropterotriton	FALSE	FALSE	swabbing	Bd	TCWC30580	PreservedSpecimen		TCWC		30580						wild										3.2 mi W El Lobo		quantitative PCR											Mexico	Queretaro
Sean Rovito	Mizraim Olivares Miranda	1100	-99.1595	21.2719	1969-12-26	magnipes	Chiropterotriton	FALSE	FALSE	swabbing	Bd	TCWC30581	PreservedSpecimen		TCWC		30581						wild										3.2 mi W El Lobo		quantitative PCR											Mexico	Queretaro
Sean Rovito	Mizraim Olivares Miranda	1100	-99.1595	21.2719	1969-12-23	magnipes	Chiropterotriton	FALSE	FALSE	swabbing	Bd	TCWC30588	PreservedSpecimen		TCWC		30588						wild										3.2 mi W El Lobo		quantitative PCR											Mexico	Queretaro
Sean Rovito	Mizraim Olivares Miranda	1100	-99.1595	21.2719	1970-06-27	magnipes	Chiropterotriton	FALSE	FALSE	swabbing	Bd	TCWC30590	PreservedSpecimen		TCWC		30590						wild										3.2 mi W El Lobo		quantitative PCR											Mexico	Queretaro
Sean Rovito	Mizraim Olivares Miranda	1100	-99.1595	21.2719	1970-01-28	magnipes	Chiropterotriton	FALSE	FALSE	swabbing	Bd	TCWC30602	PreservedSpecimen		TCWC		30602						wild										3.2 mi W El Lobo		quantitative PCR											Mexico	Queretaro
Sean Rovito	Mizraim Olivares Miranda	1100	-99.1595	21.2719	1970-01-28	magnipes	Chiropterotriton	FALSE	FALSE	swabbing	Bd	TCWC30603	PreservedSpecimen		TCWC		30603						wild										3.2 mi W El Lobo		quantitative PCR											Mexico	Queretaro
Sean Rovito	Mizraim Olivares Miranda	1100	-99.1595	21.2719	1970-01-28	magnipes	Chiropterotriton	FALSE	FALSE	swabbing	Bd	TCWC30604	PreservedSpecimen		TCWC		30604						wild										3.2 mi W El Lobo		quantitative PCR											Mexico	Queretaro
Sean Rovito	Mizraim Olivares Miranda	1100	-99.1595	21.2719	1970-01-28	magnipes	Chiropterotriton	FALSE	TRUE	swabbing	Bd	TCWC30606	PreservedSpecimen		TCWC		30606						wild										3.2 mi W El Lobo		quantitative PCR											Mexico	Queretaro
Sean Rovito	Mizraim Olivares Miranda	1100	-99.1595	21.2719	1970-01-28	magnipes	Chiropterotriton	FALSE	FALSE	swabbing	Bd	TCWC30609	PreservedSpecimen		TCWC		30609						wild										3.2 mi W El Lobo		quantitative PCR											Mexico	Queretaro
Sean Rovito	Mizraim Olivares Miranda	1100	-99.1595	21.2719	1970-01-29	magnipes	Chiropterotriton	FALSE	FALSE	swabbing	Bd	TCWC30610	PreservedSpecimen		TCWC		30610						wild										3.2 mi W El Lobo		quantitative PCR											Mexico	Queretaro
Sean Rovito	Mizraim Olivares Miranda	1100	-99.1595	21.2719	1970-01-18	magnipes	Chiropterotriton	FALSE	FALSE	swabbing	Bd	TCWC30611	PreservedSpecimen		TCWC		30611						wild										3.2 mi W El Lobo		quantitative PCR											Mexico	Queretaro
Sean Rovito	Mizraim Olivares Miranda	1100	-99.1595	21.2719	1970-01-28	magnipes	Chiropterotriton	FALSE	FALSE	swabbing	Bd	TCWC30613	PreservedSpecimen		TCWC		30613						wild										3.2 mi W El Lobo		quantitative PCR											Mexico	Queretaro
Sean Rovito	Mizraim Olivares Miranda	1100	-99.1595	21.2719	1970-01-28	magnipes	Chiropterotriton	FALSE	FALSE	swabbing	Bd	TCWC30614	PreservedSpecimen		TCWC		30614						wild										3.2 mi W El Lobo		quantitative PCR											Mexico	Queretaro
Sean Rovito	Mizraim Olivares Miranda	1100	-99.1595	21.2719	1970-01-28	magnipes	Chiropterotriton	FALSE	FALSE	swabbing	Bd	TCWC30616	PreservedSpecimen		TCWC		30616						wild										3.2 mi W El Lobo		quantitative PCR											Mexico	Queretaro
Sean Rovito	Mizraim Olivares Miranda	1100	-99.1595	21.2719	1970-01-28	magnipes	Chiropterotriton	FALSE	FALSE	swabbing	Bd	TCWC30617	PreservedSpecimen		TCWC		30617						wild										3.2 mi W El Lobo		quantitative PCR											Mexico	Queretaro
Sean Rovito	Mizraim Olivares Miranda	1100	-99.1595	21.2719	1970-01-28	magnipes	Chiropterotriton	FALSE	FALSE	swabbing	Bd	TCWC30618	PreservedSpecimen		TCWC		30618						wild										3.2 mi W El Lobo		quantitative PCR											Mexico	Queretaro
Sean Rovito	Mizraim Olivares Miranda	1100	-99.1595	21.2719	1970-01-28	magnipes	Chiropterotriton	FALSE	FALSE	swabbing	Bd	TCWC30619	PreservedSpecimen		TCWC		30619						wild										3.2 mi W El Lobo		quantitative PCR											Mexico	Queretaro
Sean Rovito	Mizraim Olivares Miranda	1100	-99.1595	21.2719	1970-01-28	magnipes	Chiropterotriton	FALSE	FALSE	swabbing	Bd	TCWC30619	PreservedSpecimen		TCWC		30619						wild										3.2 mi W El Lobo		quantitative PCR											Mexico	Queretaro
Sean Rovito	Mizraim Olivares Miranda	1100	-99.1595	21.2719	1970-01-28	magnipes	Chiropterotriton	FALSE	FALSE	swabbing	Bd	TCWC30620	PreservedSpecimen		TCWC		30620						wild										3.2 mi W El Lobo		quantitative PCR											Mexico	Queretaro
Sean Rovito	Mizraim Olivares Miranda	1100	-99.1595	21.2719	1970-01-28	magnipes	Chiropterotriton	FALSE	FALSE	swabbing	Bd	TCWC30621	PreservedSpecimen		TCWC		30621						wild										3.2 mi W El Lobo		quantitative PCR											Mexico	Queretaro
Sean Rovito	Mizraim Olivares Miranda	1100	-99.1595	21.2719	1970-01-29	magnipes	Chiropterotriton	FALSE	FALSE	swabbing	Bd	TCWC30623	PreservedSpecimen		TCWC		30623						wild										3.2 mi W El Lobo		quantitative PCR											Mexico	Queretaro
Sean Rovito	Mizraim Olivares Miranda	1100	-99.1595	21.2719	1970-01-29	magnipes	Chiropterotriton	FALSE	FALSE	swabbing	Bd	TCWC30625	PreservedSpecimen		TCWC		30625						wild										3.2 mi W El Lobo		quantitative PCR											Mexico	Queretaro
Sean Rovito	Mizraim Olivares Miranda	1100	-99.1595	21.2719	1970-01-29	magnipes	Chiropterotriton	FALSE	FALSE	swabbing	Bd	TCWC30626	PreservedSpecimen		TCWC		30626						wild										3.2 mi W El Lobo		quantitative PCR											Mexico	Queretaro
Sean Rovito	Mizraim Olivares Miranda	1100	-99.1595	21.2719	1970-01-29	magnipes	Chiropterotriton	FALSE	FALSE	swabbing	Bd	TCWC30627	PreservedSpecimen		TCWC		30627						wild										3.2 mi W El Lobo		quantitative PCR											Mexico	Queretaro
Sean Rovito	Mizraim Olivares Miranda	1100	-99.1595	21.2719	1970-01-28	magnipes	Chiropterotriton	FALSE	FALSE	swabbing	Bd	TCWC30591	PreservedSpecimen		TCWC		30591						wild										3.2 mi W, 1.8 mi S El Lobo		quantitative PCR											Mexico	Queretaro
Sean Rovito	Mizraim Olivares Miranda	1100	-99.1595	21.2719	1970-01-28	magnipes	Chiropterotriton	FALSE	FALSE	swabbing	Bd	TCWC30593	PreservedSpecimen		TCWC		30593						wild										3.2 mi W, 1.8 mi S El Lobo		quantitative PCR											Mexico	Queretaro
Sean Rovito	Mizraim Olivares Miranda	1100	-99.1595	21.2719	1970-01-28	magnipes	Chiropterotriton	FALSE	FALSE	swabbing	Bd	TCWC30595	PreservedSpecimen		TCWC		30595						wild										3.2 mi W, 1.8 mi S El Lobo		quantitative PCR											Mexico	Queretaro
Sean Rovito	Mizraim Olivares Miranda	1100	-99.1595	21.2719	1970-01-28	magnipes	Chiropterotriton	FALSE	FALSE	swabbing	Bd	TCWC30598	PreservedSpecimen		TCWC		30598						wild										3.2 mi W, 1.8 mi S El Lobo		quantitative PCR											Mexico	Queretaro
Sean Rovito	Mizraim Olivares Miranda	1100	-99.1658	21.2662	1970-09-15	magnipes	Chiropterotriton	FALSE	FALSE	swabbing	Bd	TCWC32994	PreservedSpecimen		TCWC		32994						wild										3.8 mi W El Lobo		quantitative PCR											Mexico	Queretaro
Sean Rovito	Mizraim Olivares Miranda	1100	-99.1658	21.2662	1970-09-15	magnipes	Chiropterotriton	FALSE	FALSE	swabbing	Bd	TCWC32995	PreservedSpecimen		TCWC		32995						wild										3.8 mi W El Lobo		quantitative PCR											Mexico	Queretaro
Sean Rovito	Mizraim Olivares Miranda	1100	-99.1658	21.2662	1971-12-27	magnipes	Chiropterotriton	FALSE	FALSE	swabbing	Bd	TCWC37675	PreservedSpecimen		TCWC		37675						wild										3.8 mi W El Lobo		quantitative PCR											Mexico	Queretaro
Sean Rovito	Mizraim Olivares Miranda	1100	-99.1684	21.2641	1970-06-27	magnipes	Chiropterotriton	FALSE	FALSE	swabbing	Bd	TCWC31612	PreservedSpecimen		TCWC		31612						wild										4 mi W El Lobo		quantitative PCR											Mexico	Queretaro
Sean Rovito	Mizraim Olivares Miranda	1100	-99.1684	21.2641	1970-06-27	magnipes	Chiropterotriton	FALSE	FALSE	swabbing	Bd	TCWC31613	PreservedSpecimen		TCWC		31613						wild										4 mi W El Lobo		quantitative PCR											Mexico	Queretaro
Sean Rovito	Mizraim Olivares Miranda	1100	-99.1684	21.2641	1970-06-27	magnipes	Chiropterotriton	FALSE	FALSE	swabbing	Bd	TCWC31614	PreservedSpecimen		TCWC		31614						wild										4 mi W El Lobo		quantitative PCR											Mexico	Queretaro
Sean Rovito	Mizraim Olivares Miranda	1100	-99.1684	21.2641	1970-06-27	magnipes	Chiropterotriton	FALSE	FALSE	swabbing	Bd	TCWC31615	PreservedSpecimen		TCWC		31615						wild										4 mi W El Lobo		quantitative PCR											Mexico	Queretaro
Sean Rovito	Mizraim Olivares Miranda	1100	-99.1684	21.2641	1970-06-27	magnipes	Chiropterotriton	FALSE	FALSE	swabbing	Bd	TCWC31617	PreservedSpecimen		TCWC		31617						wild										4 mi W El Lobo		quantitative PCR											Mexico	Queretaro
Sean Rovito	Mizraim Olivares Miranda	1100	-99.1684	21.2641	1970-06-27	magnipes	Chiropterotriton	FALSE	FALSE	swabbing	Bd	TCWC31618	PreservedSpecimen		TCWC		31618						wild										4 mi W El Lobo		quantitative PCR											Mexico	Queretaro
Sean Rovito	Mizraim Olivares Miranda	1100	-99.1684	21.2641	1970-06-27	magnipes	Chiropterotriton	FALSE	FALSE	swabbing	Bd	TCWC31619	PreservedSpecimen		TCWC		31619						wild										4 mi W El Lobo		quantitative PCR											Mexico	Queretaro
Sean Rovito	Mizraim Olivares Miranda	1100	-99.1684	21.2641	1970-06-27	magnipes	Chiropterotriton	FALSE	FALSE	swabbing	Bd	TCWC31620	PreservedSpecimen		TCWC		31620						wild										4 mi W El Lobo		quantitative PCR											Mexico	Queretaro
Sean Rovito	Mizraim Olivares Miranda	1100	-99.1684	21.2641	1970-06-27	magnipes	Chiropterotriton	FALSE	FALSE	swabbing	Bd	TCWC31621	PreservedSpecimen		TCWC		31621						wild										4 mi W El Lobo		quantitative PCR											Mexico	Queretaro
Sean Rovito	Mizraim Olivares Miranda	1100	-99.1684	21.2641	1970-06-27	magnipes	Chiropterotriton	FALSE	FALSE	swabbing	Bd	TCWC31622	PreservedSpecimen		TCWC		31622						wild										4 mi W El Lobo		quantitative PCR											Mexico	Queretaro
Sean Rovito	Mizraim Olivares Miranda	1100	-99.1684	21.2641	1970-06-27	magnipes	Chiropterotriton	FALSE	FALSE	swabbing	Bd	TCWC31623	PreservedSpecimen		TCWC		31623						wild										4 mi W El Lobo		quantitative PCR											Mexico	Queretaro
Sean Rovito	Mizraim Olivares Miranda	1100	-99.1684	21.2641	1970-06-27	magnipes	Chiropterotriton	FALSE	FALSE	swabbing	Bd	TCWC31624	PreservedSpecimen		TCWC		31624						wild										4 mi W El Lobo		quantitative PCR											Mexico	Queretaro
Sean Rovito	Mizraim Olivares Miranda	1100	-99.1684	21.2641	1970-06-27	magnipes	Chiropterotriton	FALSE	FALSE	swabbing	Bd	TCWC31625	PreservedSpecimen		TCWC		31625						wild										4 mi W El Lobo		quantitative PCR											Mexico	Queretaro
Sean Rovito	Mizraim Olivares Miranda	1100	-99.1684	21.2641	1970-06-27	magnipes	Chiropterotriton	FALSE	FALSE	swabbing	Bd	TCWC31626	PreservedSpecimen		TCWC		31626						wild										4 mi W El Lobo		quantitative PCR											Mexico	Queretaro
Sean Rovito	Mizraim Olivares Miranda	1100	-99.1684	21.2641	1970-06-27	magnipes	Chiropterotriton	FALSE	FALSE	swabbing	Bd	TCWC31627	PreservedSpecimen		TCWC		31627						wild										4 mi W El Lobo		quantitative PCR											Mexico	Queretaro
Sean Rovito	Mizraim Olivares Miranda	1100	-99.1684	21.2641	1970-06-27	magnipes	Chiropterotriton	FALSE	FALSE	swabbing	Bd	TCWC31628	PreservedSpecimen		TCWC		31628						wild										4 mi W El Lobo		quantitative PCR											Mexico	Queretaro
Sean Rovito	Mizraim Olivares Miranda	1100	-99.1684	21.2641	1970-06-27	magnipes	Chiropterotriton	FALSE	FALSE	swabbing	Bd	TCWC31629	PreservedSpecimen		TCWC		31629						wild										4 mi W El Lobo		quantitative PCR											Mexico	Queretaro
Sean Rovito	Mizraim Olivares Miranda	1100	-99.1684	21.2641	1970-06-27	magnipes	Chiropterotriton	FALSE	FALSE	swabbing	Bd	TCWC31630	PreservedSpecimen		TCWC		31630						wild										4 mi W El Lobo		quantitative PCR											Mexico	Queretaro
Sean Rovito	Mizraim Olivares Miranda	1100	-99.1684	21.2641	1970-06-27	magnipes	Chiropterotriton	FALSE	FALSE	swabbing	Bd	TCWC31631	PreservedSpecimen		TCWC		31631						wild										4 mi W El Lobo		quantitative PCR											Mexico	Queretaro

## Sheet: Data Fields
ColumnName	Definition	Controlled Vocabulary (see Lists)	Data Format	Synonyms
ContactName	Usually same as primary Collector; if different, include here.
Collector	Full name of primary Collector (no initials please!)
coordinateUncertaintyInMeters	If latitude and longitude from GPS unit and no other information gathered, assume 30 m coordinateUncertaintyinMeters
decimalLongitude
decimalLatitude
dateCollected	The date of sampling, preferably in ISO format (e.g., 2015-01-31)
specificEpithet	Taxonomic names will be validated with AmphibiaWeb taxonomy (http://amphibiaweb.org/taxonomy/index.html)
genus	Taxonomic names will be validated with AmphibiaWeb taxonomy (http://amphibiaweb.org/taxonomy/index.html)
fatal	At time of sampling, presumed cause of death to be diseaseTested, mark [FALSE] if unknown	trueFalse
diseaseDetected	Result of disease testing: True=Positive, False=Negative, No Confidence=Ambiguous	diseaseDetected
sampleType	Type of sample tested: eg, swabbing, blood, skin, liver	sampleType
diseaseTested	Controlled vocabulary: Bd, Bsal, Bd+Bsal, Other	diseaseTested
sampleID	Must be a unique identifier (may be numbers and letters), such as a lab sample number or field number. No null values allowed.
basisOfRecord	Sample is from a PreservedSpecimen or LivingSpecimen	basisOfRecord
occurrenceID	May be a URN, LSID, URI if exists
institutionCode	Institution acronym (e.g., MVZ, CAS, etc)
collectionCode	Institution's collection code (e.g., Herpetology)
catalogNumber	If PreservedSpecimen, the catalog number
labNumber	unique number assigned in the lab
diseaseLineage	Specific genetic lineage detected (if available) NCBI URI (e.g., http://www.ncbi.nlm.nih.gov/biosample/xxxxxxx)
genotypeMethod	Genotyping methods used to determine diseaseLineage if present (e.g., whole genome sequencing, ITS sequencing, multilocus nuclear sequencing).
sequenceURI	Sequence data URI if posted on another repository.
specimenDisposition	Post-sampling status: [released|collected|preserved|captive|captive-preserved]	specimenDisposition
originalsource	Relevant if organism is alive at time of sampling. Assumed 'wild' if a preserved voucher specimen, unless noted otherwise	originalsource
infraspecificEpithet	Taxonomic names will be validated with AmphibiaWeb taxonomy (http://amphibiaweb.org/taxonomy/index.html)
lifeStage	Controlled vocabulary: egg, larva, juvenile, adult
sex	Controlled vocabulary: male, female, not determined
datum	If no other information available, assumed to be WGS84
georeferenceSource	E.g., GPS (make), Google Earth, etc
elevation	Values in meters only. If estimate or range, note in eventRemarks.
depth	Depth below local surface water in meters.
Collector2	Additional collector, if needed
Collector3	Additional collector, if needed
verbatimLocality
Habitat
Test_Method	Controlled vocabulary: [traditional PCR][quantitative PCR][realtime PCR][histology][Other]	Test_Method
eventRemarks	Additional remarks in locality, habitat, or specimen not captured in above fields.
quantityDetected	Number of zoospore detected. Needed to calculate Zoospore Equivalent Score (ZEscore), a measure of infection intensity (see Vredenburg et al 2010 doi: 10.1073/pnas.0914111107)
dilutionFactor	sampleType (see sampleType field) dilution factor. Needed to calculate Zoospore Equivalent Score (ZEscore), a measure of infection intensity (see Vredenburg et al 2010 doi: 10.1073/pnas.0914111107)
cycleTimeFirstDetection	Cycle number ("c(t)") at which the qPCR machine first detects a positive for chytrid ( a measure of the amount of Bd or Bsal present)
diagnosticLab	Record the diagnostic lab if different than the diagnostic lab listed in the Project details or if more than one are used.
fieldNumber	Generally a unique number assigned in the field, include initials (e.g., DBW 1234)
ZEscore	If present, these values may be entered (otherwise it will be calculated from the quantityDetected and dilutionFactor).
month	As an integer (MM).
day	As an integer (DD).
year	As an integer (YYYY).
country	Optional otherwise computed from geocoordinates.
state_province	Optional otherwise computed from geocoordinates.

## Sheet: Lists
basisOfRecord	diseaseTested	sampleType	specimenDisposition	originalsource	diseaseDetected	trueFalse	Test_Method
PreservedSpecimen	Bd	external Swab	released	wild	TRUE	TRUE	traditional PCR
LivingSpecimen	Bsal	swabbing	collected	captive	FALSE	FALSE	quantitative PCR
Literature	Other	tissue	preserved		NO_CONFIDENCE		realtime PCR
		toe clip	captive				histology
		blood	captive-preserved				Other
		other
